# Supplementary material for: Steroidal Saponins from the Rhizomes of Aspidistra typica
Source: PLoS One. 2016 Mar 3;11(3):e0150595. doi: 10.1371/journal.pone.0150595 (PMC4777403; doi:10.1371/journal.pone.0150595)
Supplement: S1 File — (DOC) [file pone.0150595.s001.doc]

**Supporting Information**

Jiang-Ming Cui 1,2¶ Li-Ping Kang 3¶, Yang Zhao 1, Jian-Yuan Zhao 4, Jie Zhang 5, Xu Pang 4, He-Shui Yu 1, De-Xian Jia 5, Chao Liu 1, Li-Yan Yu 4, Bai-Ping Ma 1*

# Affiliation

1 *Beijing Institute of Radiation Medicine, Beijing 100850, PR China;*

*2 School of Pharmaceutical Sciences, Central South University, Changsha 410013, China*

*3* *State Key Laboratory Breeding Base of Dao-di Herbs, National Resource Center for Chinese Materia Medica, China Academy of Chinese Medical Sciences, Beijng, 100700, People’s Republic of China;*

*4 Institute of Medicinal Biotechnology, Chinese Academy of Medical Sciences & Peking Union Medical College, Beijing 100050 , China;*

*5**Ovation Health Science and Technology Co.Ltd., ENN Group, Langfang 065001, China*

 Corresponding author

E-mail: mabaiping@sina.com (BPM)

¶ These authors contributed equally to this work.

Figure Aa HR-ESI-MS of compound **1**


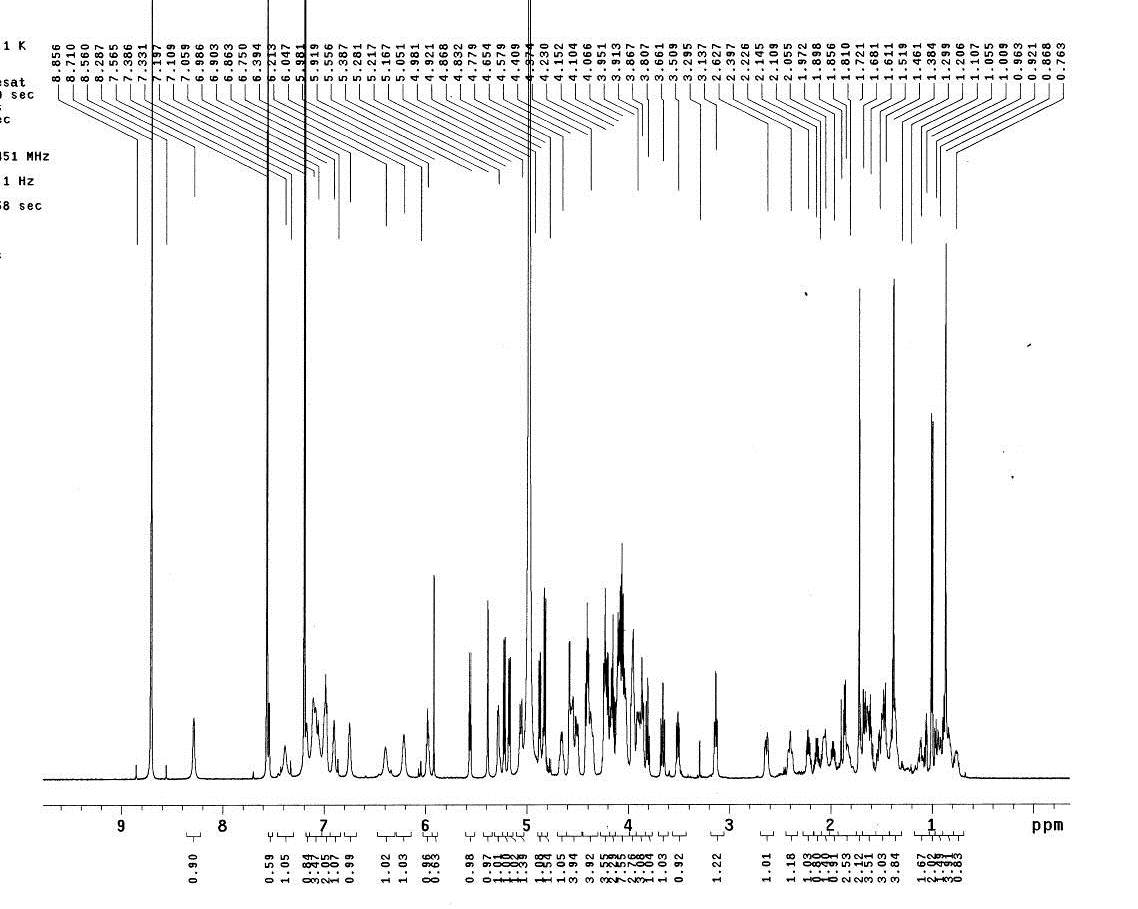


Figure Ab. 1H-NMR of compound **1**


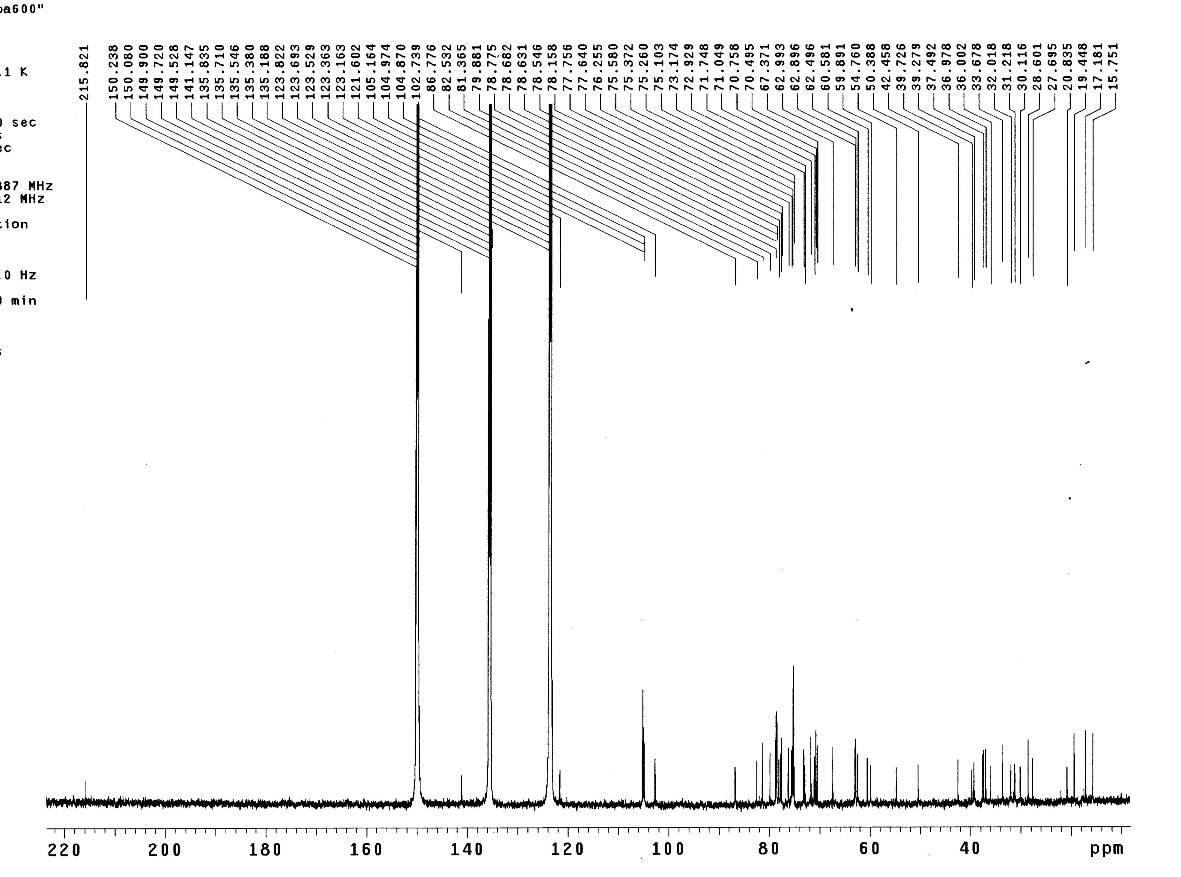


Figure Ac Fig. 13C-NMR of compound **1**


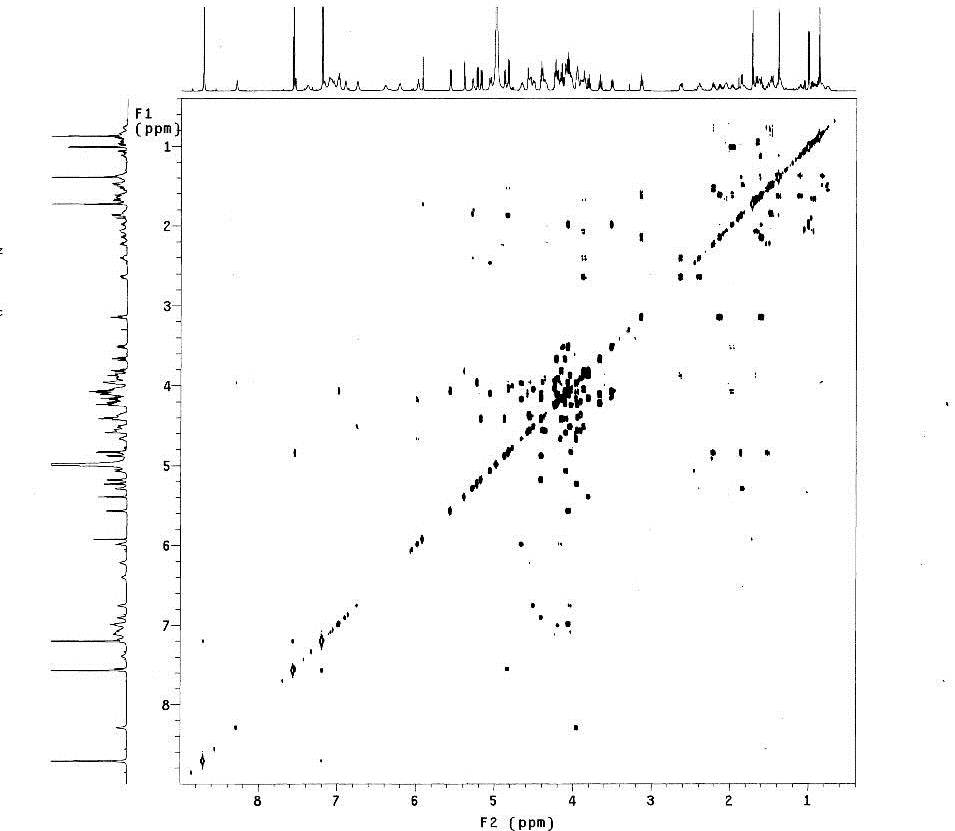


Figure Ad 1H-1H COSY of compound **1**


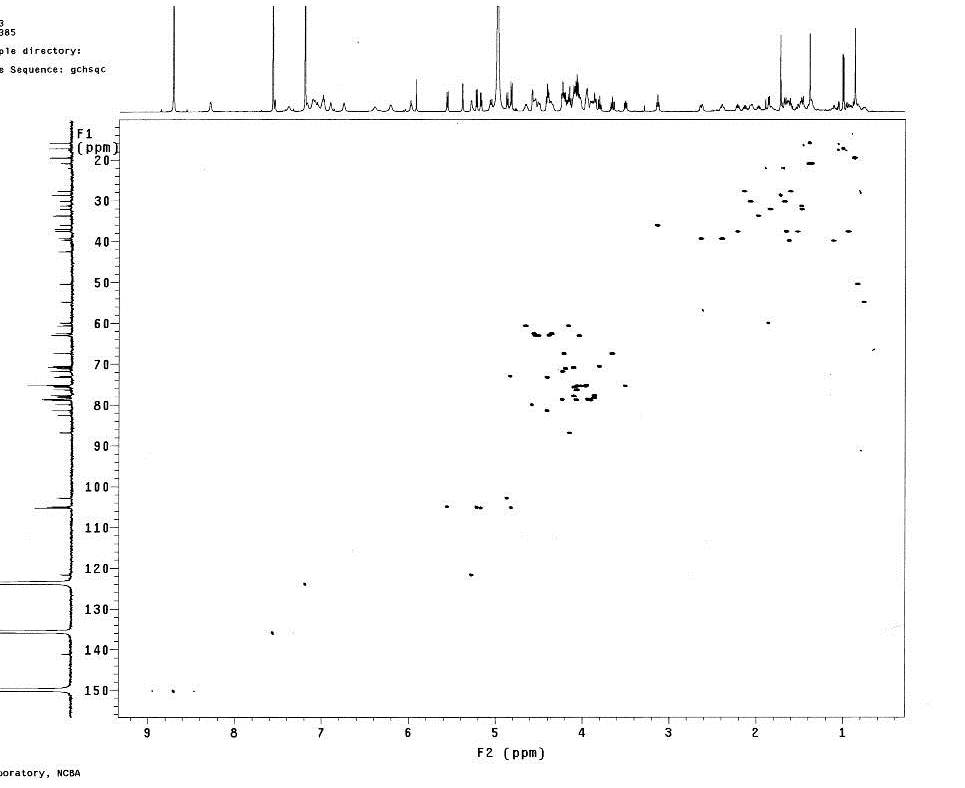


Figure Ae HSQC of compound **1**


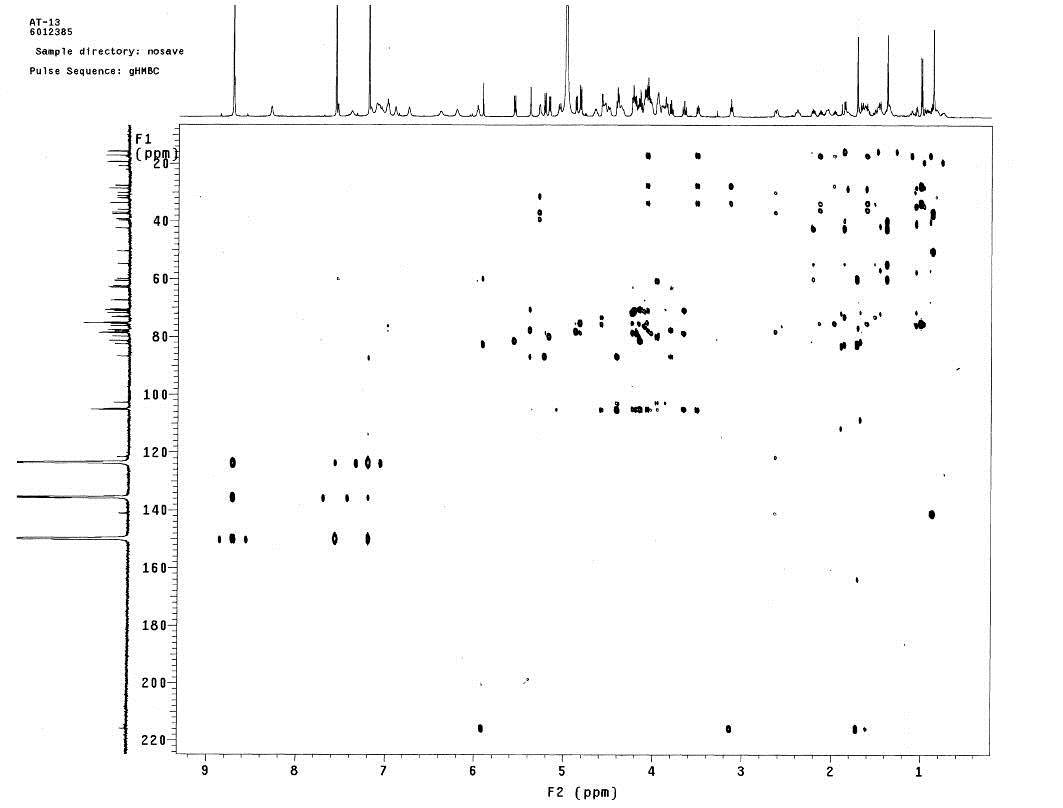


Figure Af HMBC of compound **1**


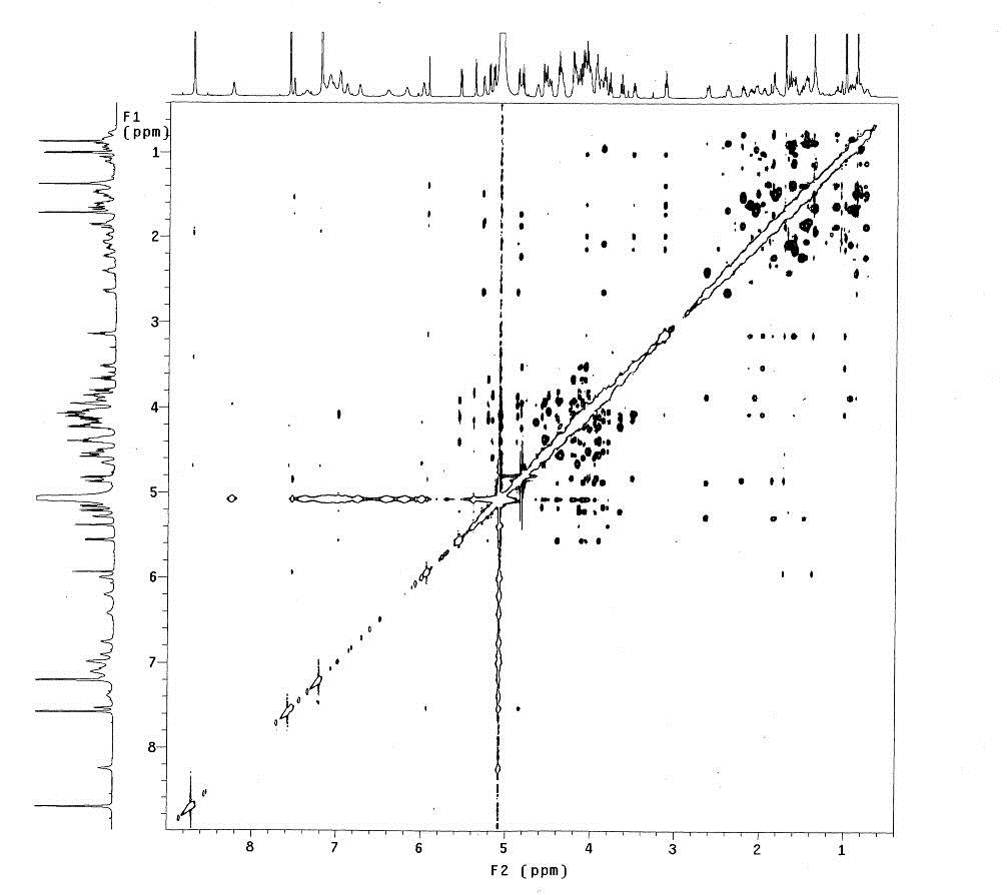


Figure Ag NOESY of compound **1**

Figure Ba HR-ESI-MS of compound **2**


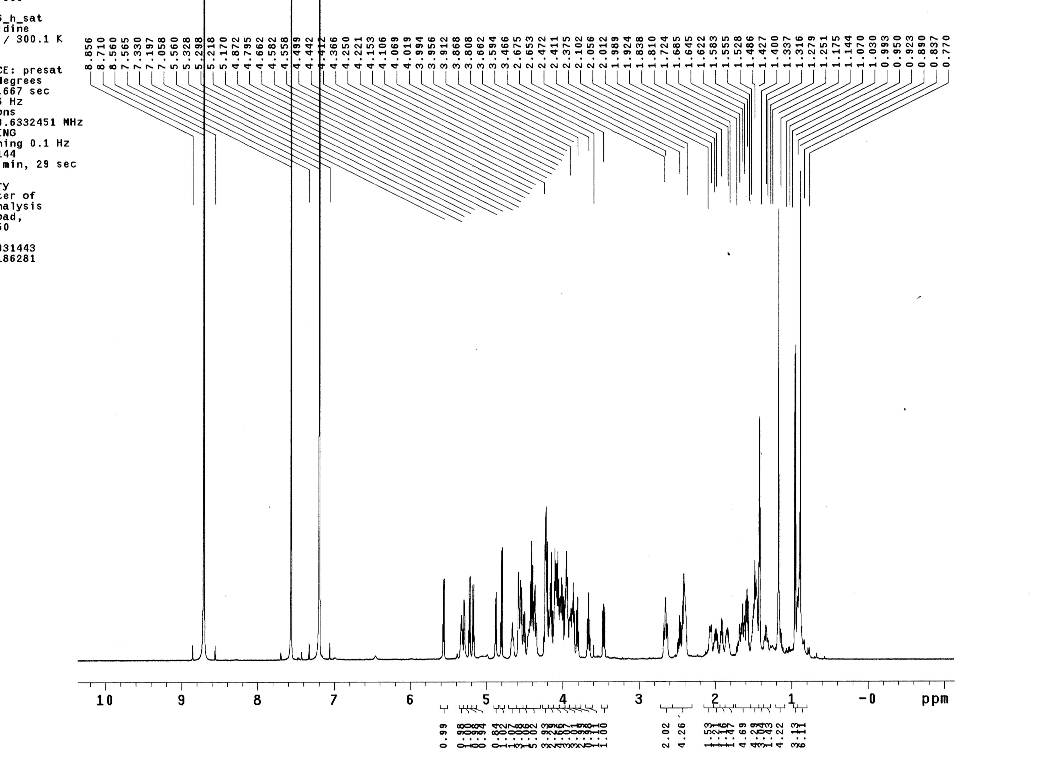


Figure Bb 1H-NMR of compound **2**

**
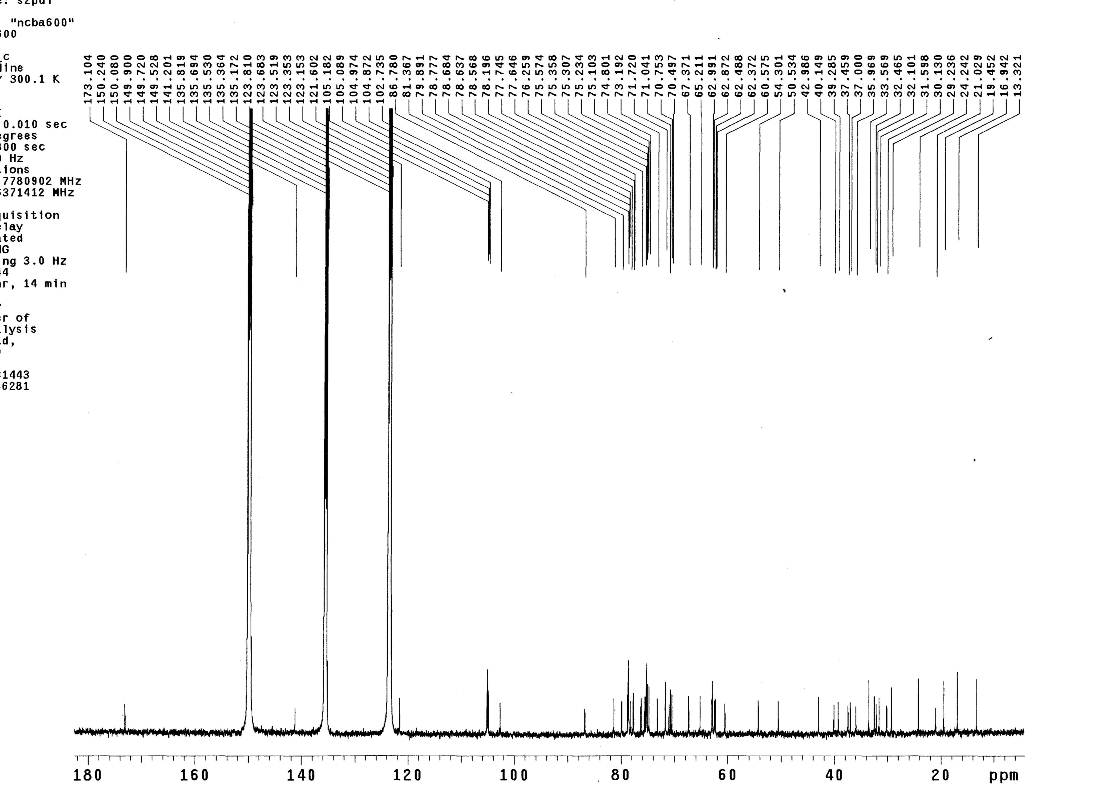
**

Figure Bc 13C-NMR of compound **2**


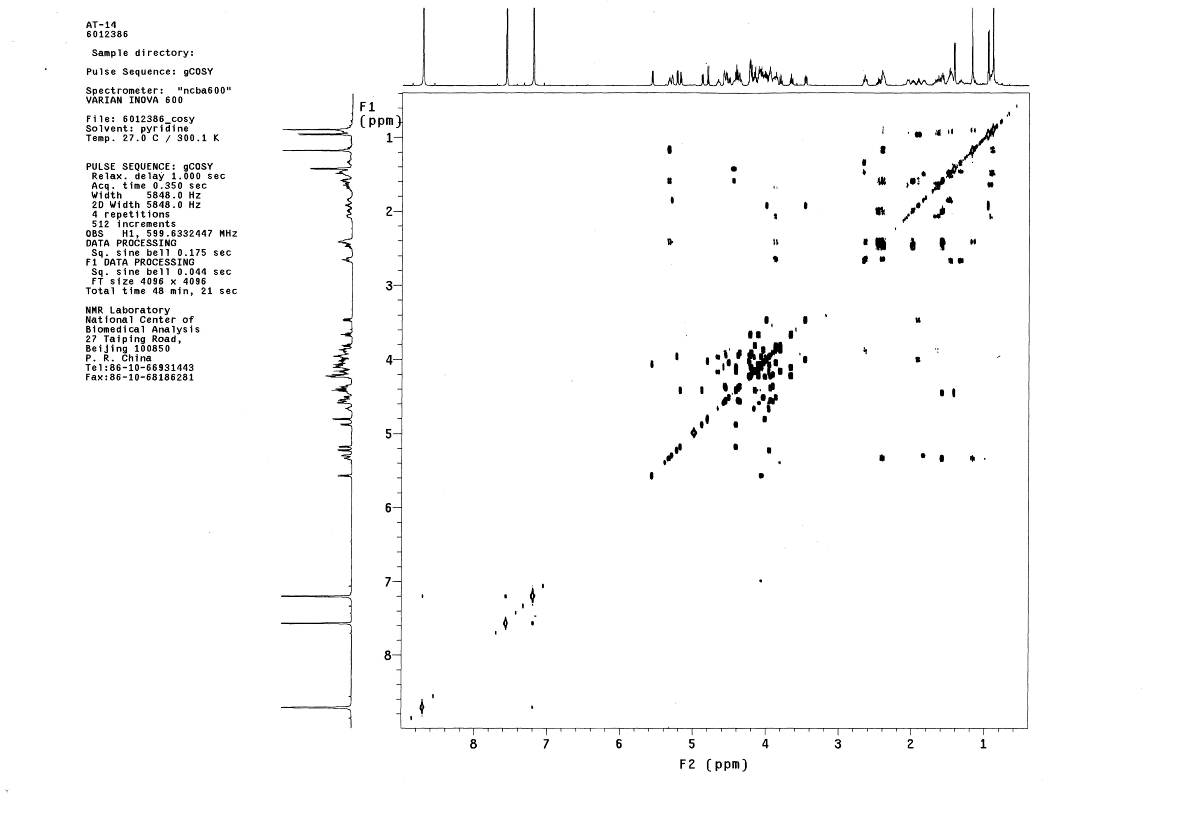


Figure Bd 1H-1H COSY of compound **2**

Figure Be HSQC of compound **2**


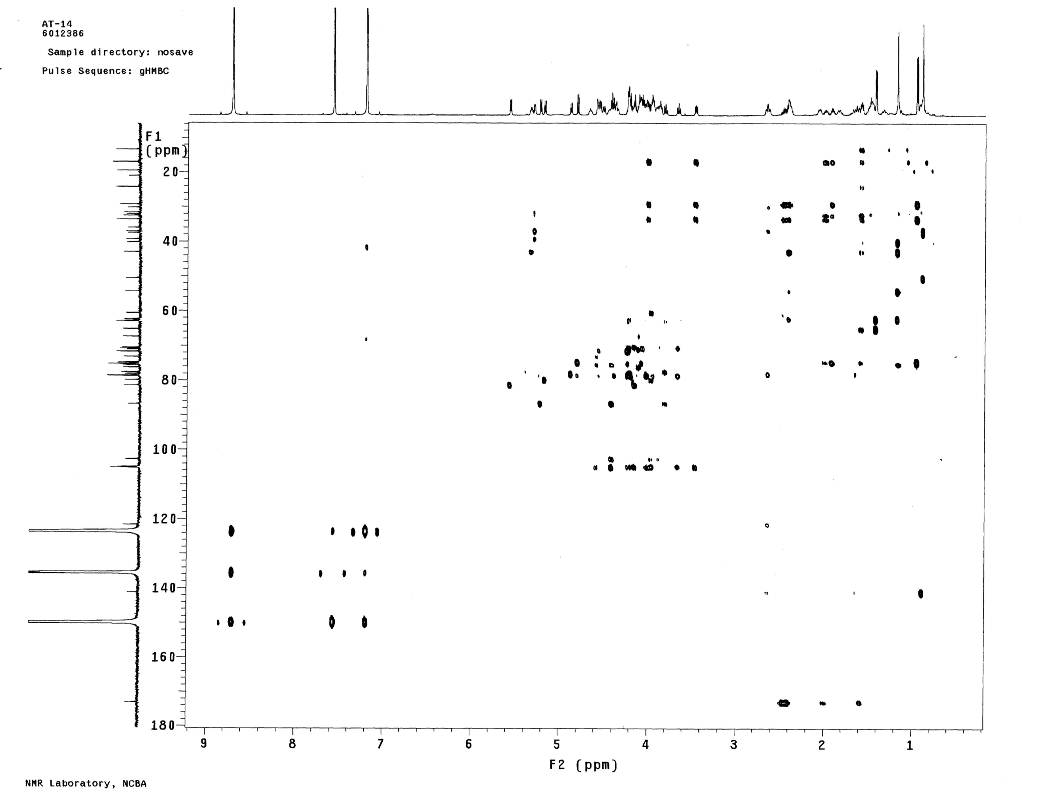


Figure Bf HMBC of compound **2**

Figure Ca HR-ESI-MS of compound **3**


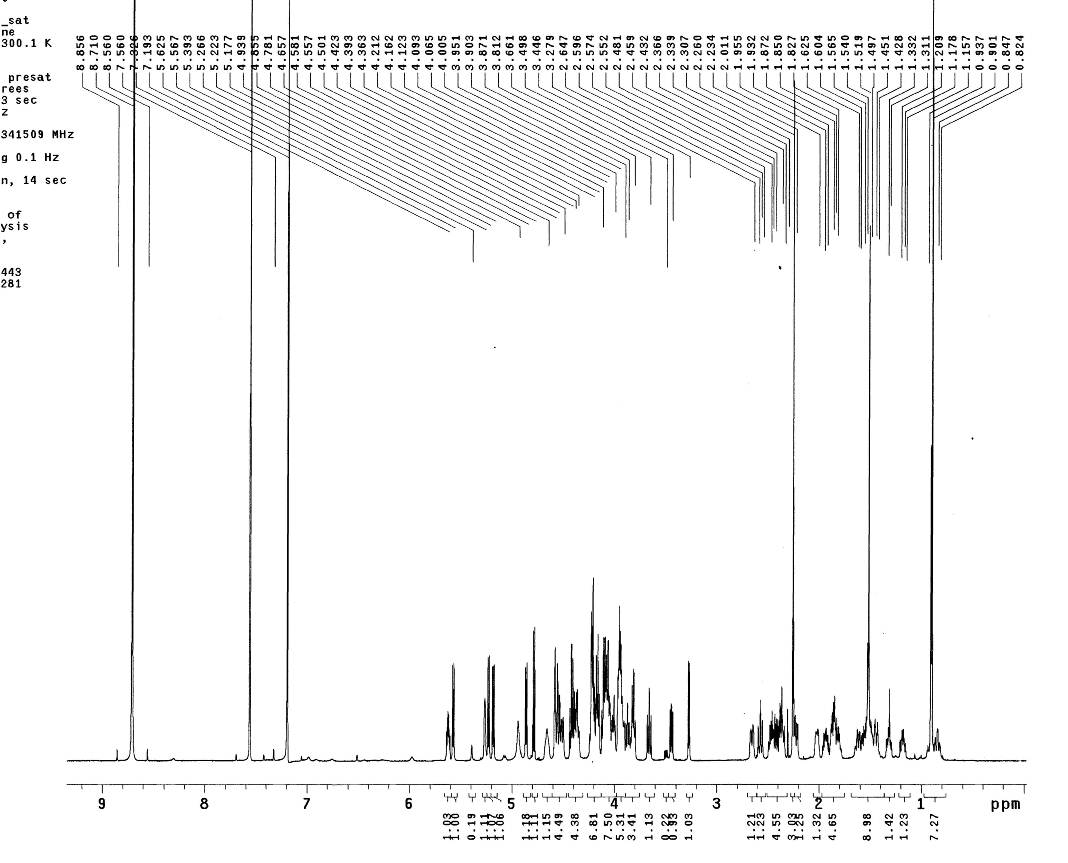


Figure Cb 1H-NMR of compound **3**


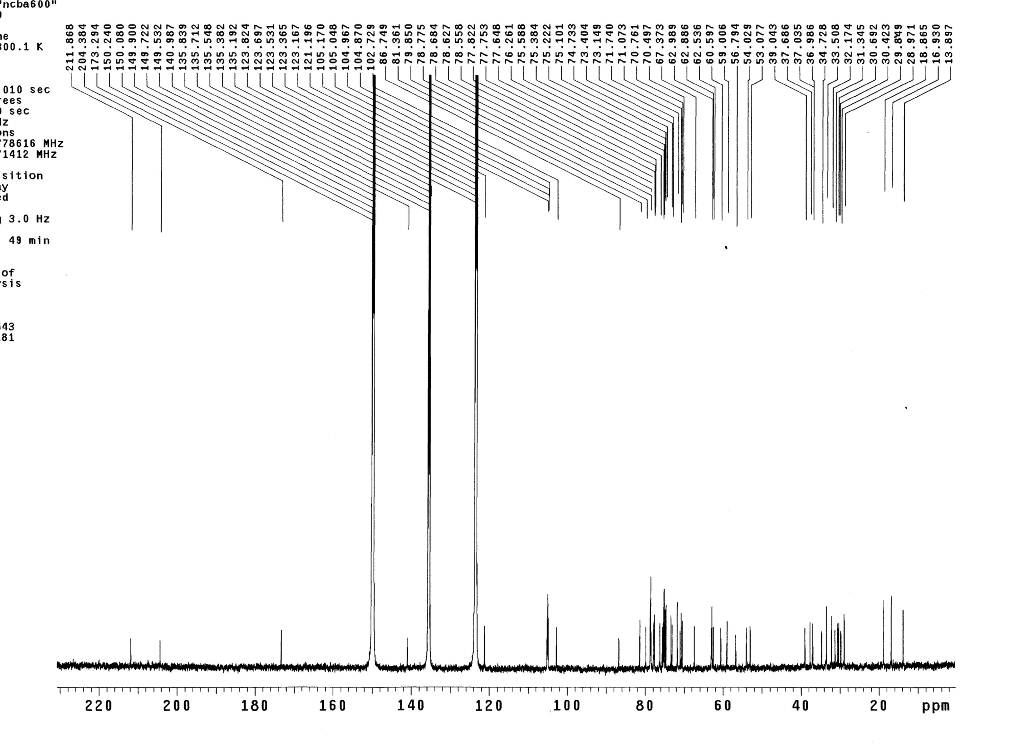


Figure Cc 13C-NMR of compound **3**


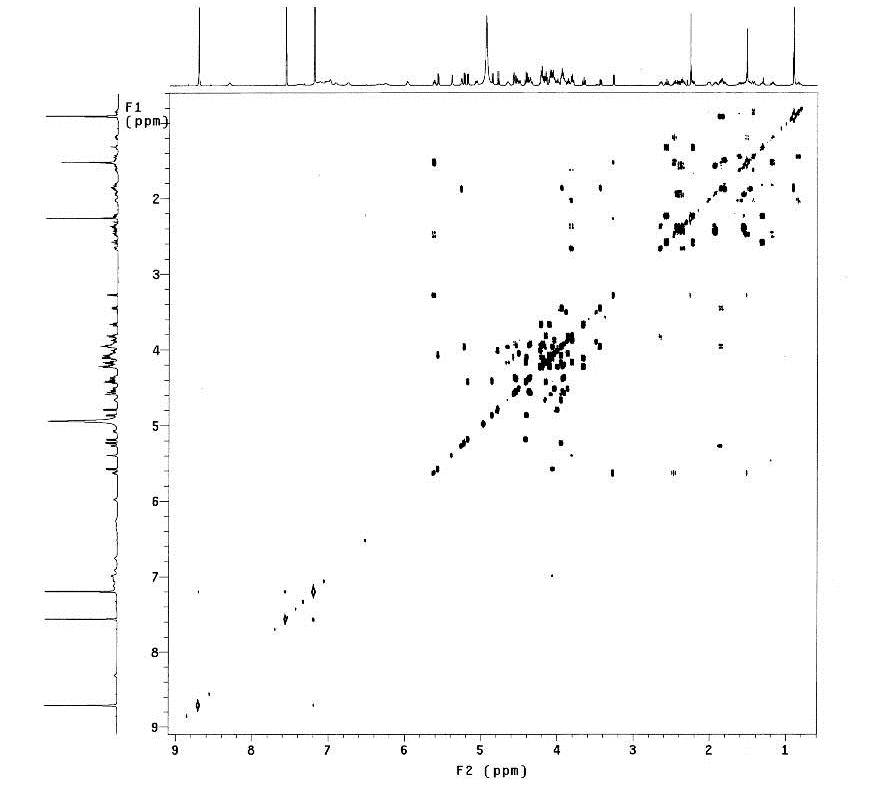


Figure Cd COSY of compound **3**

**
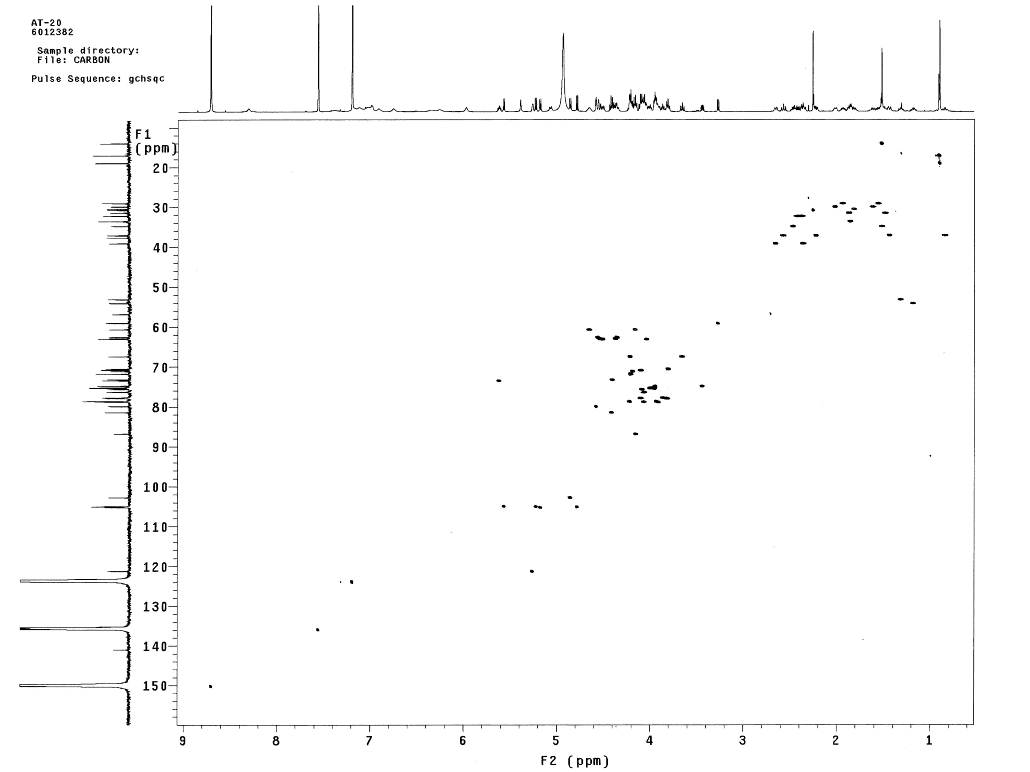
**

Figure Ce HSQC of compound **3**


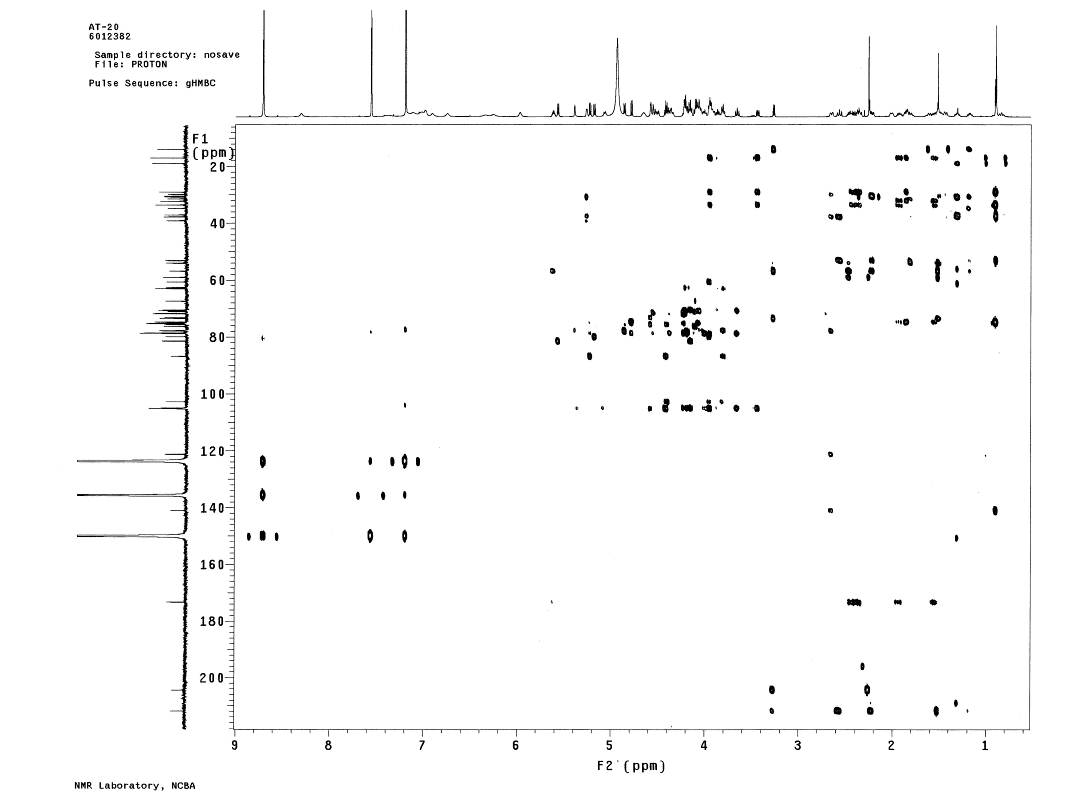


Figure Cf HMBC of compound **3**

Figure Da HR-ESI-MS of compound **4**


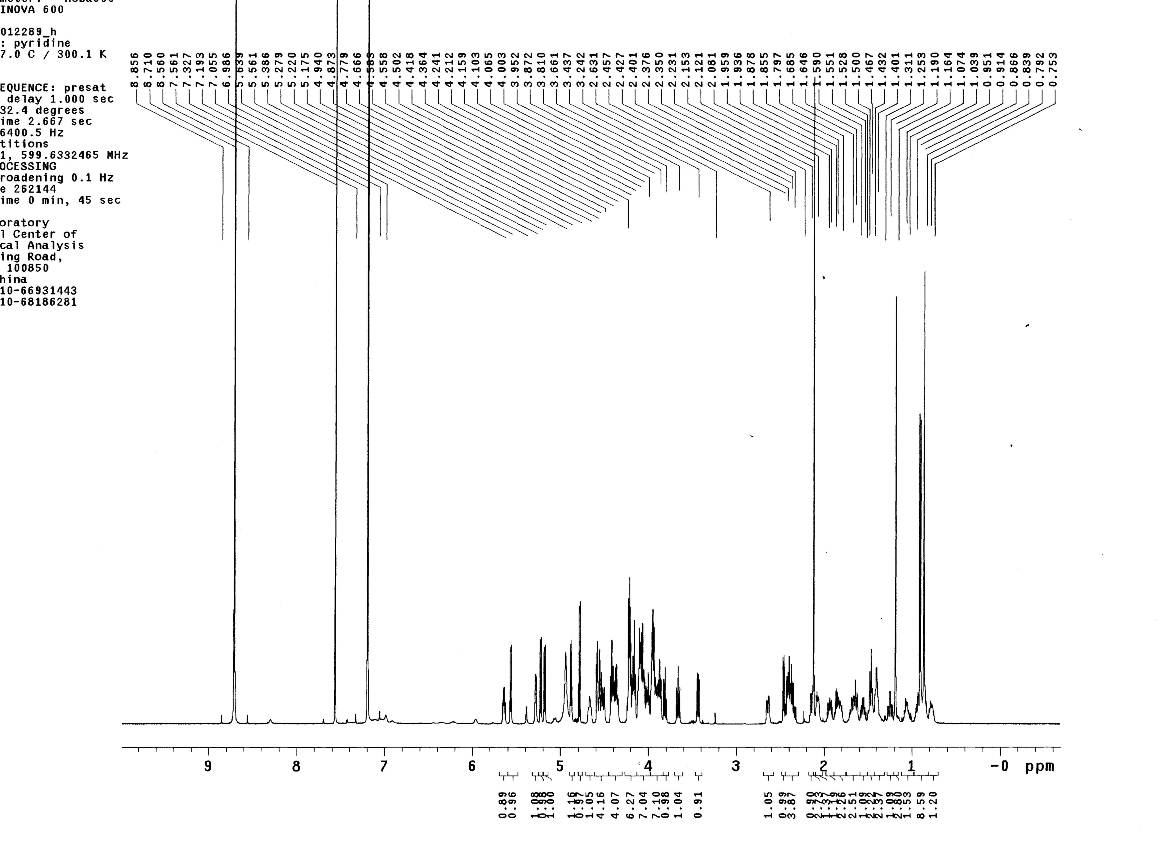


Figure Db 1H-NMR of compound **4**


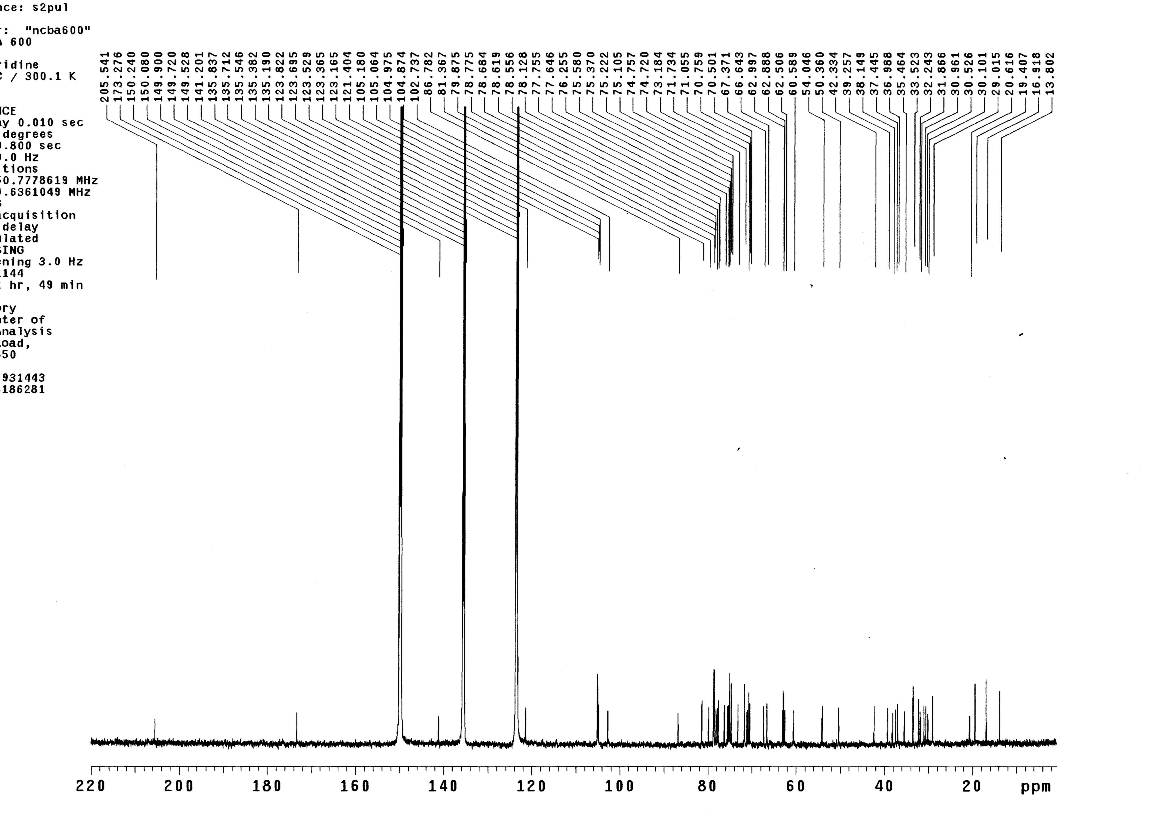


Figure Dc 13C-NMR of compound **4**


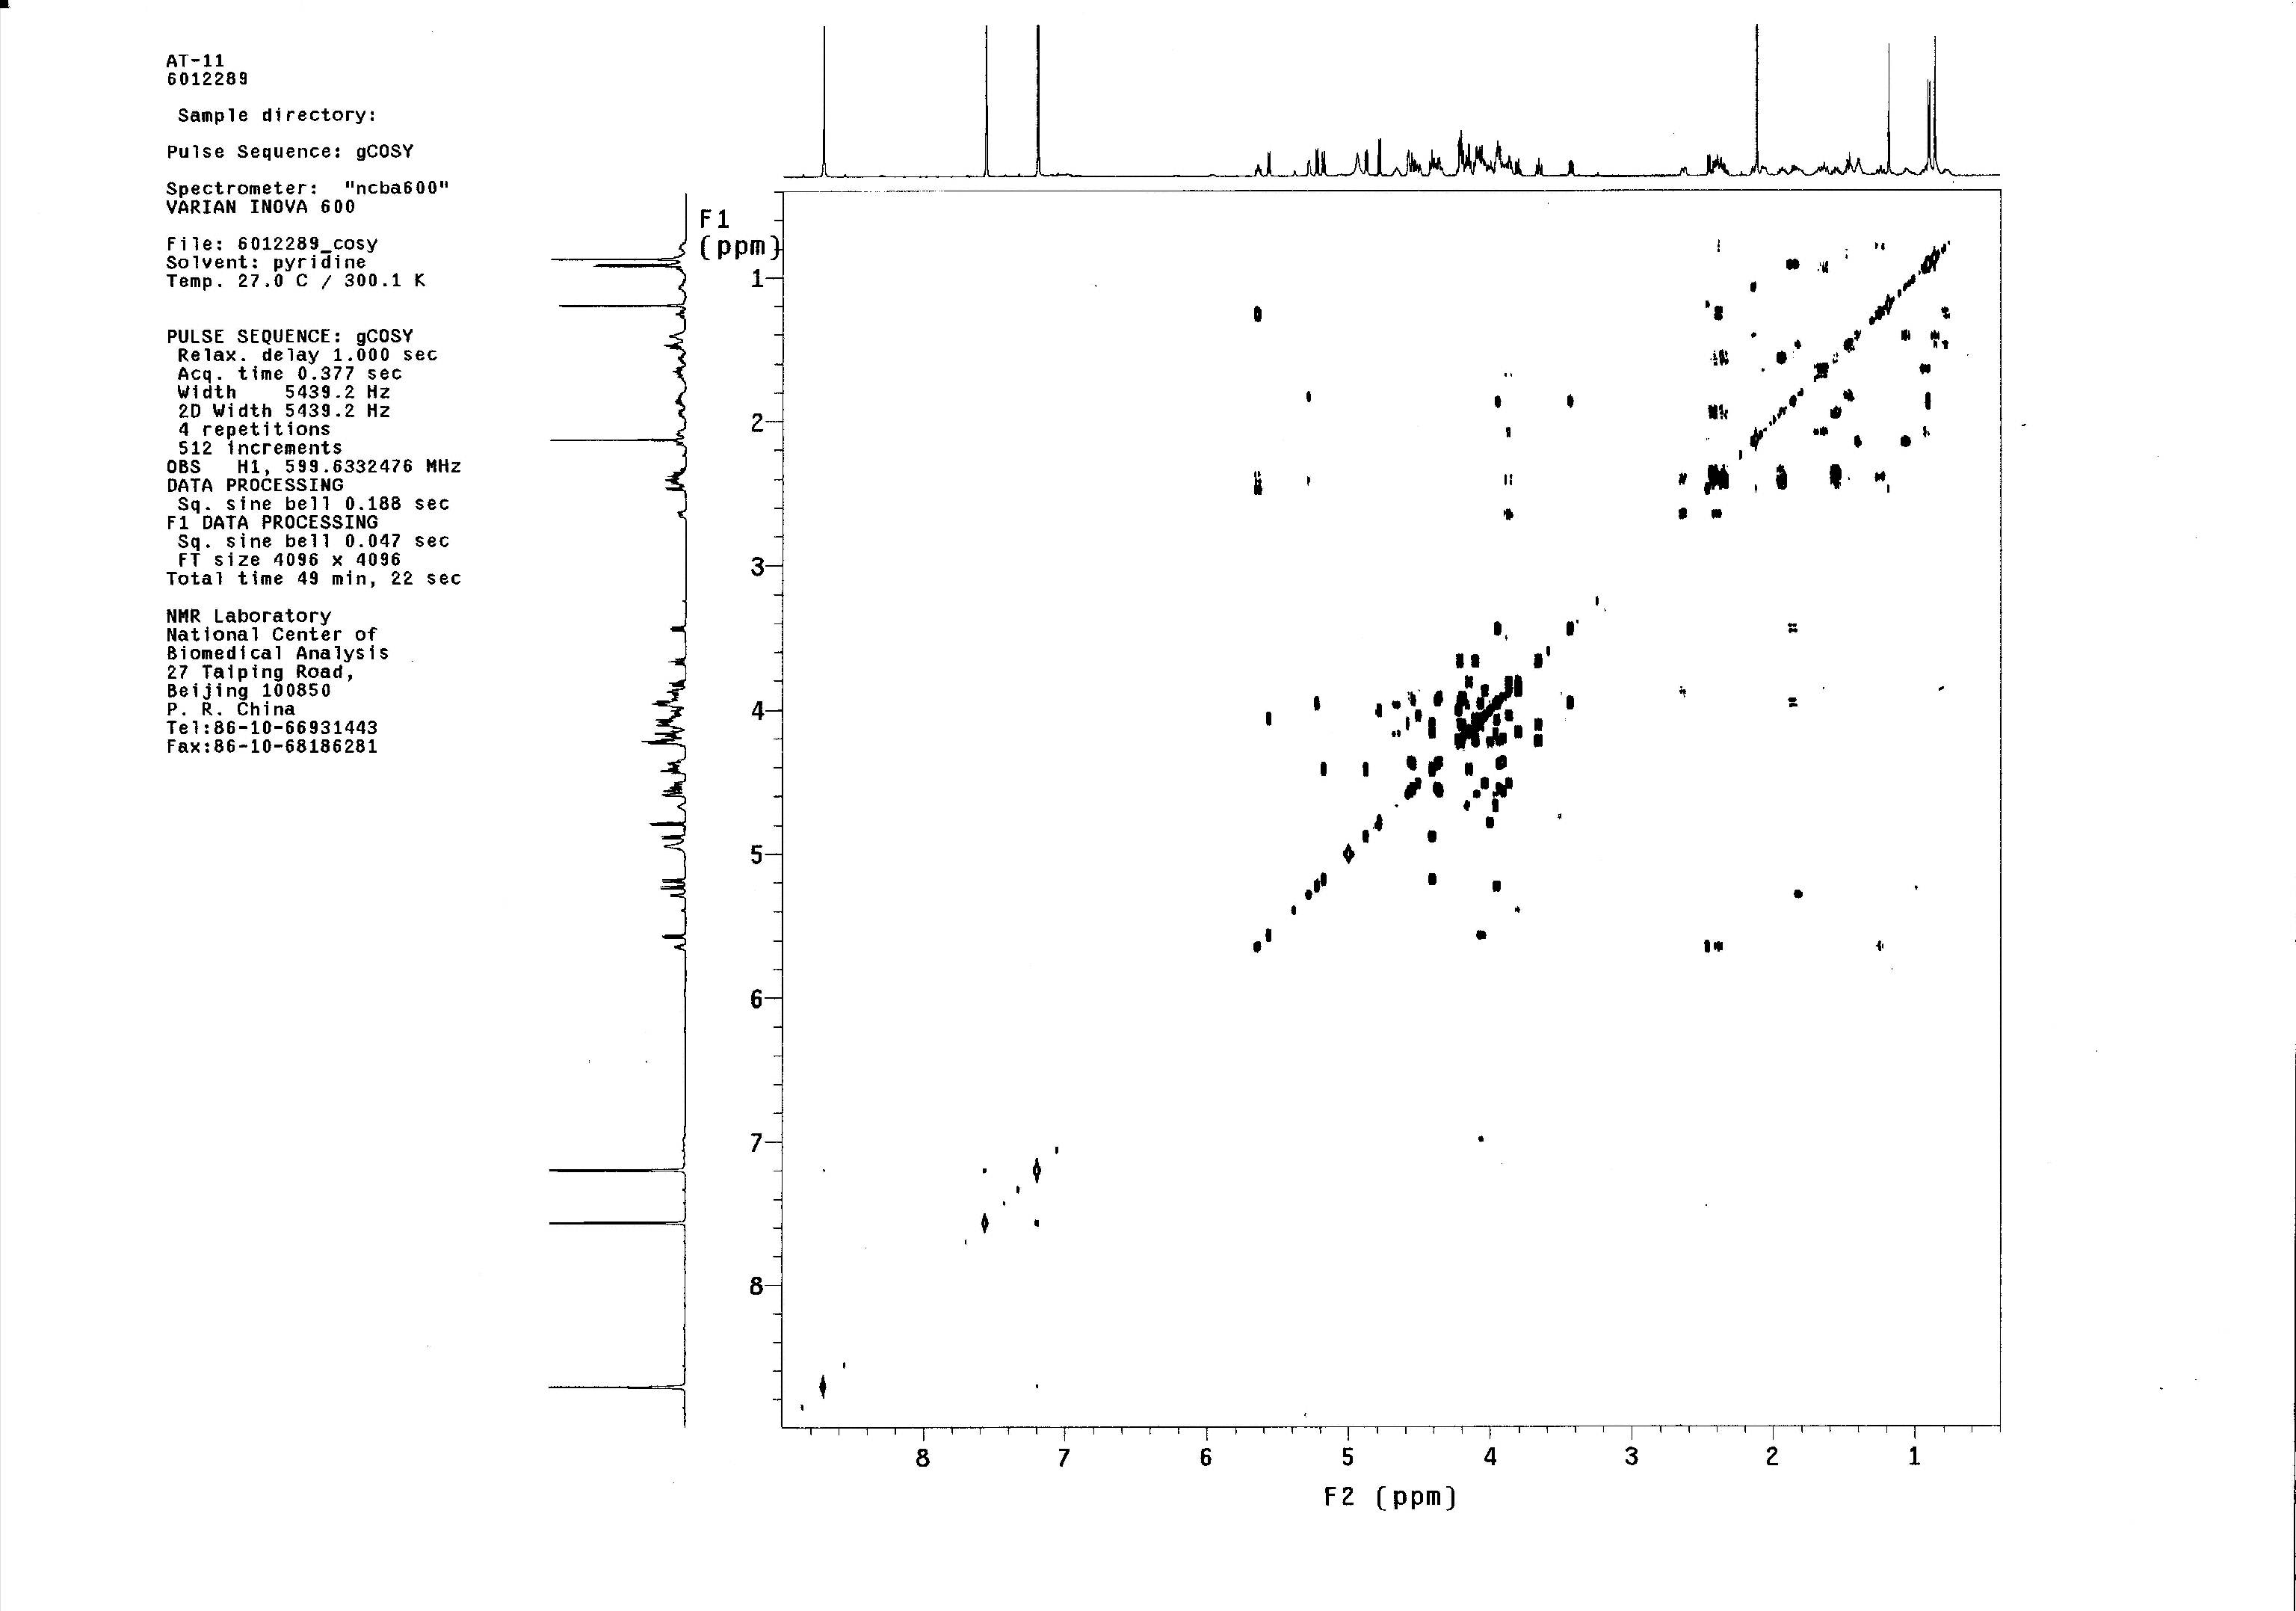


Figure Dd COSY of compound **4**


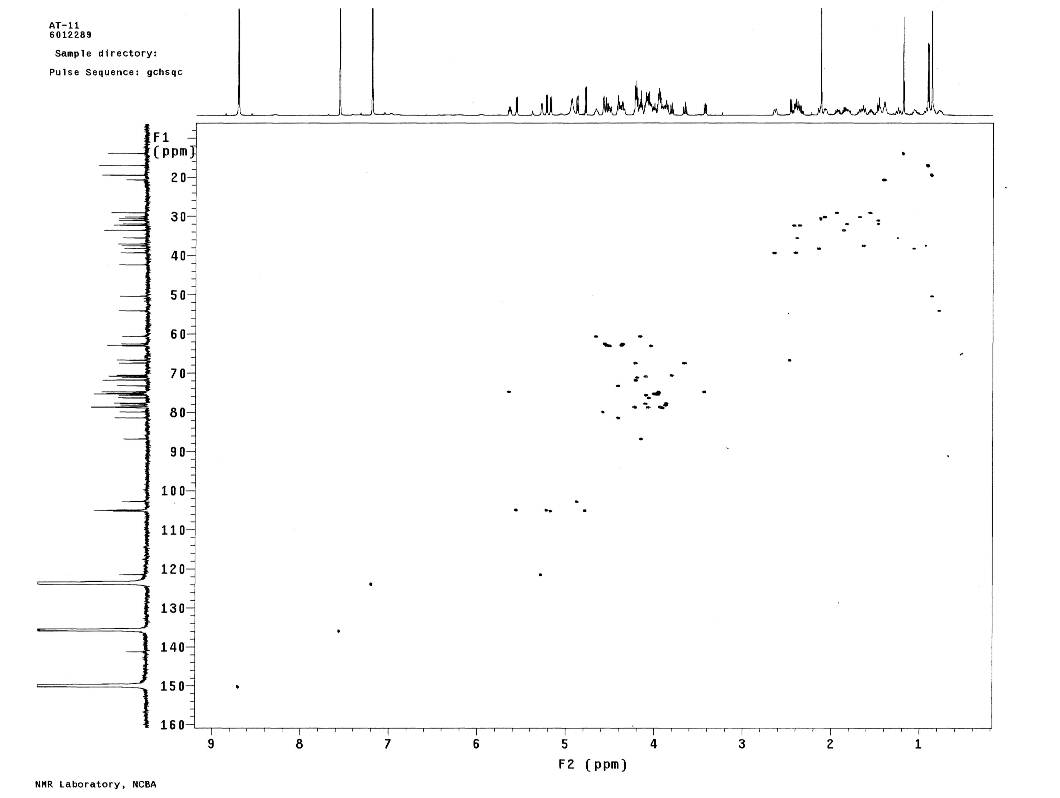


Figure De HSQC of compound **4**


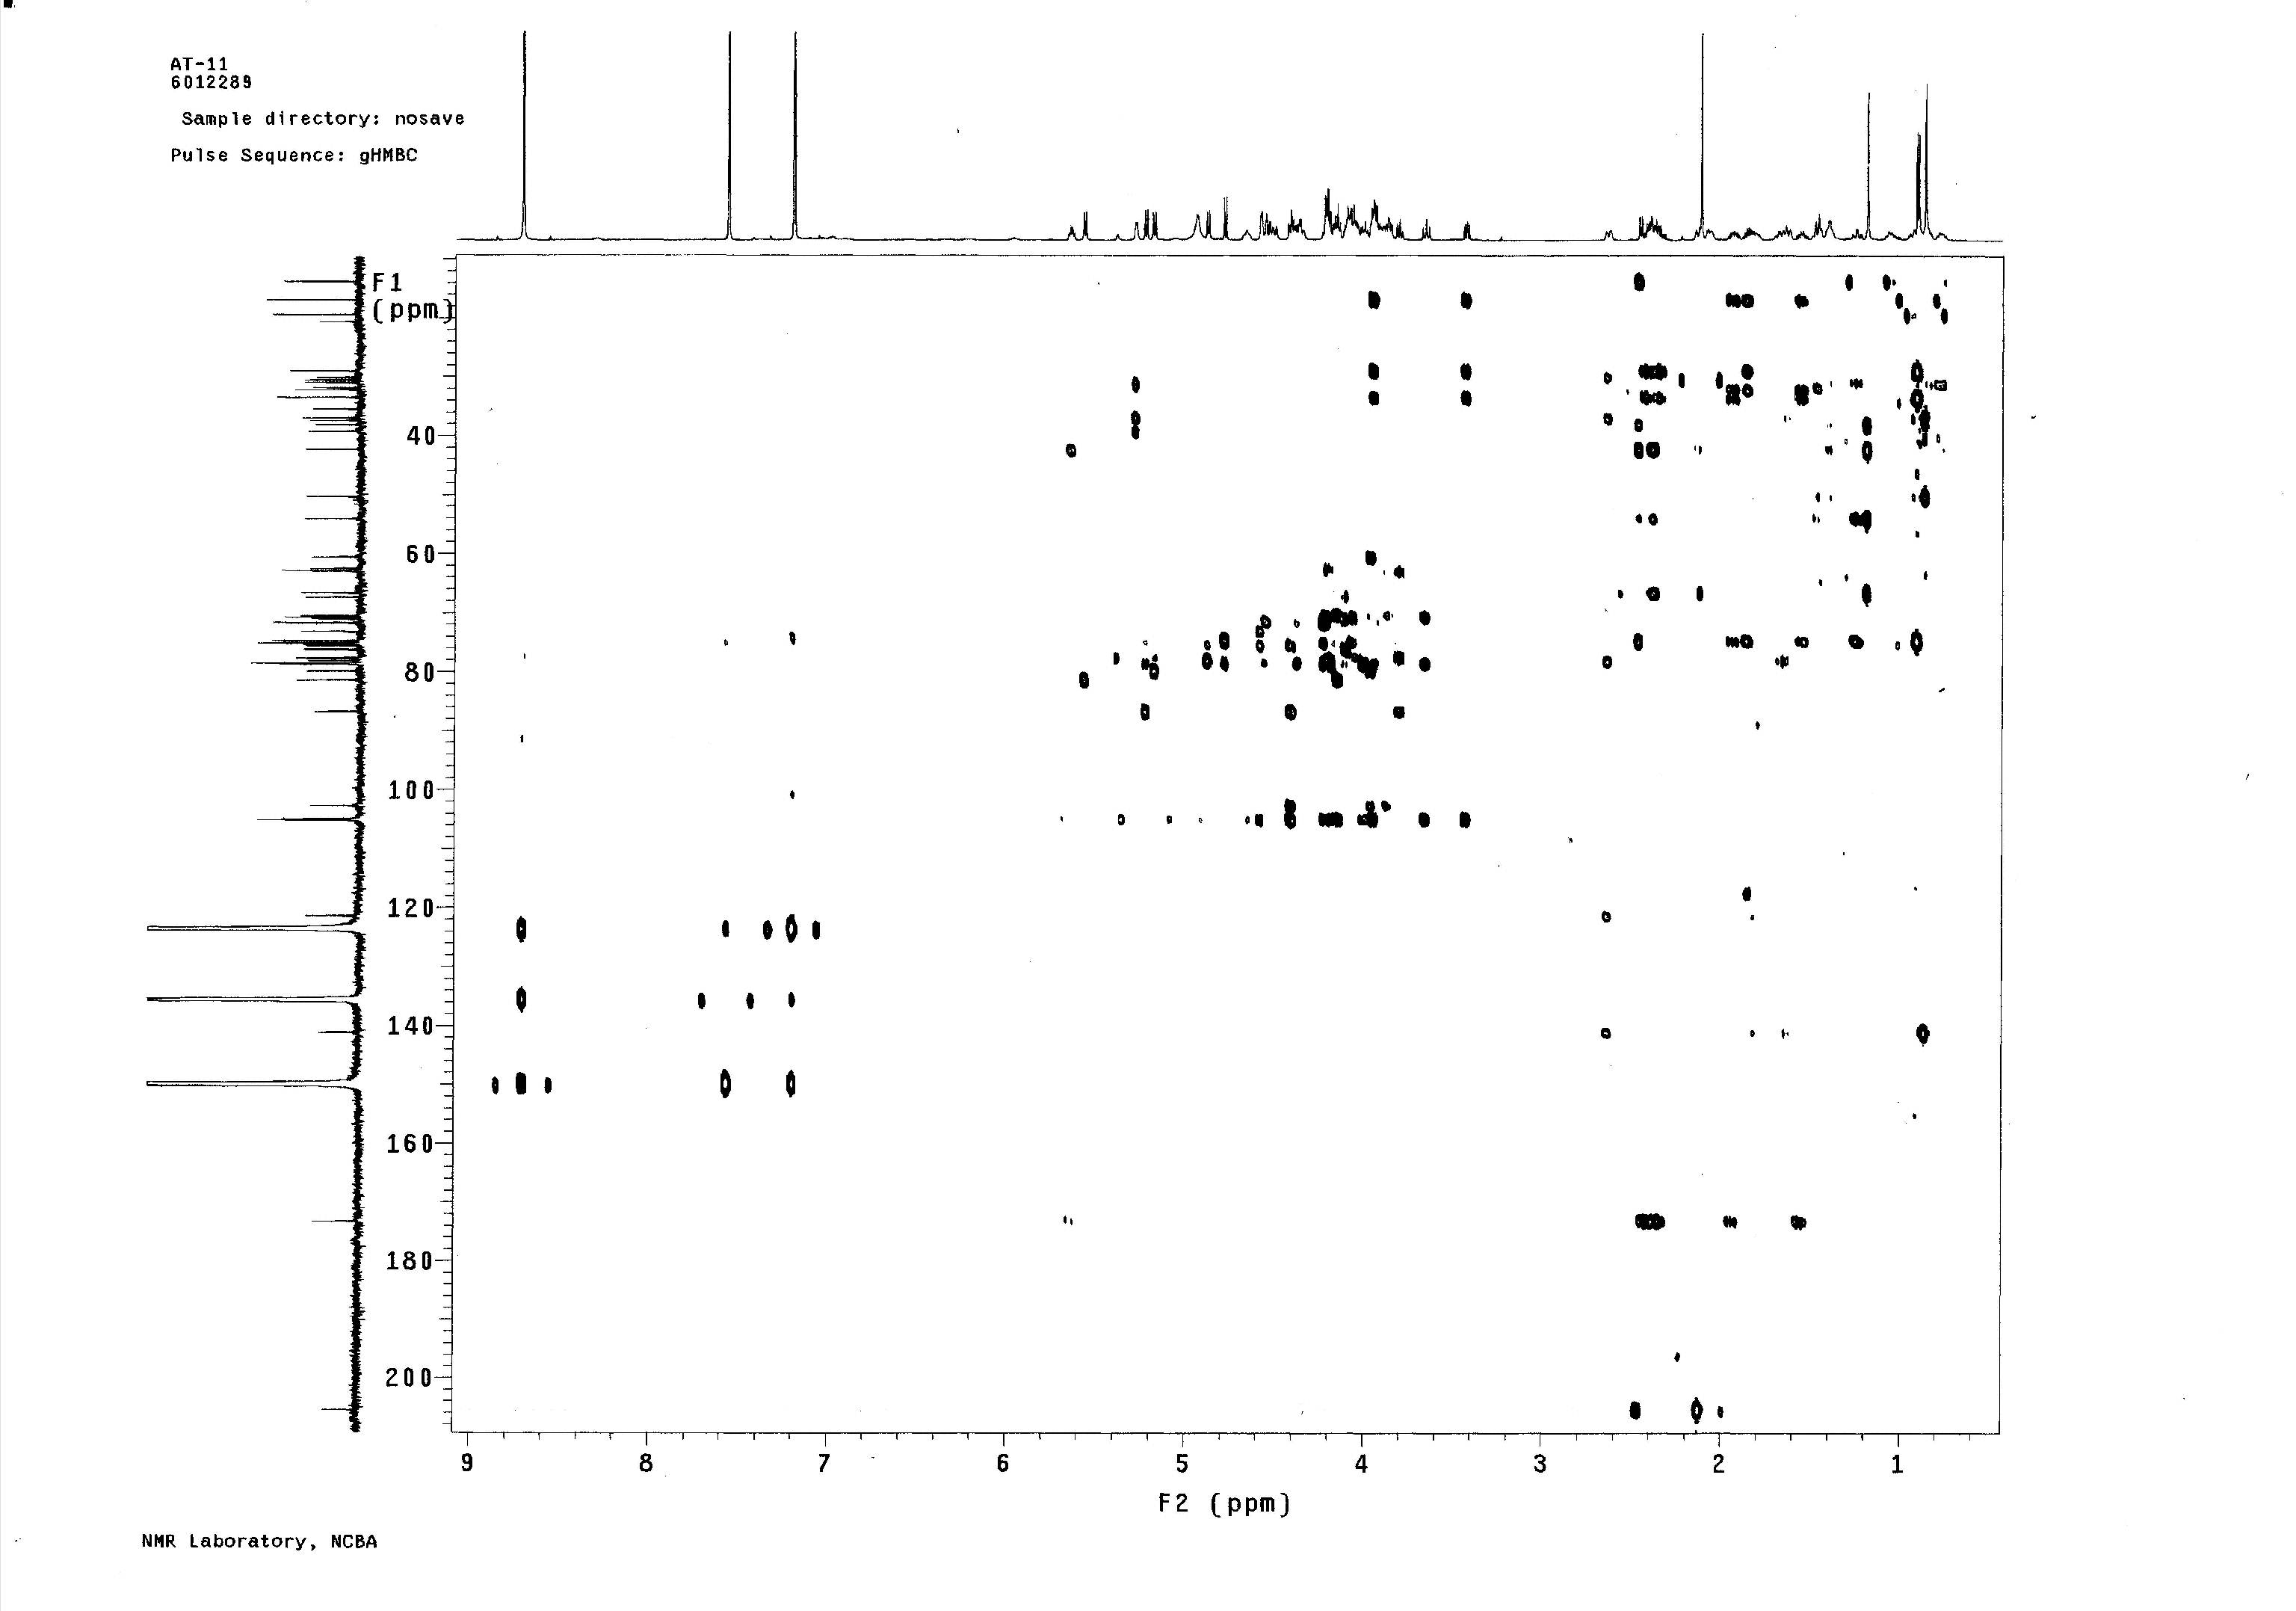


Figure Df HMBC of compound **4**

Figure Ea HR-ESI-MS of compound **5**


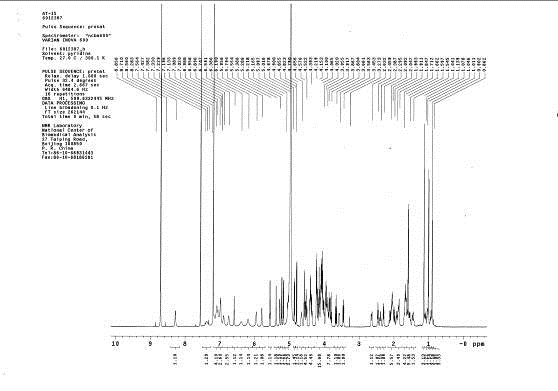
 Figure Eb 1H-NMR of compound **5**


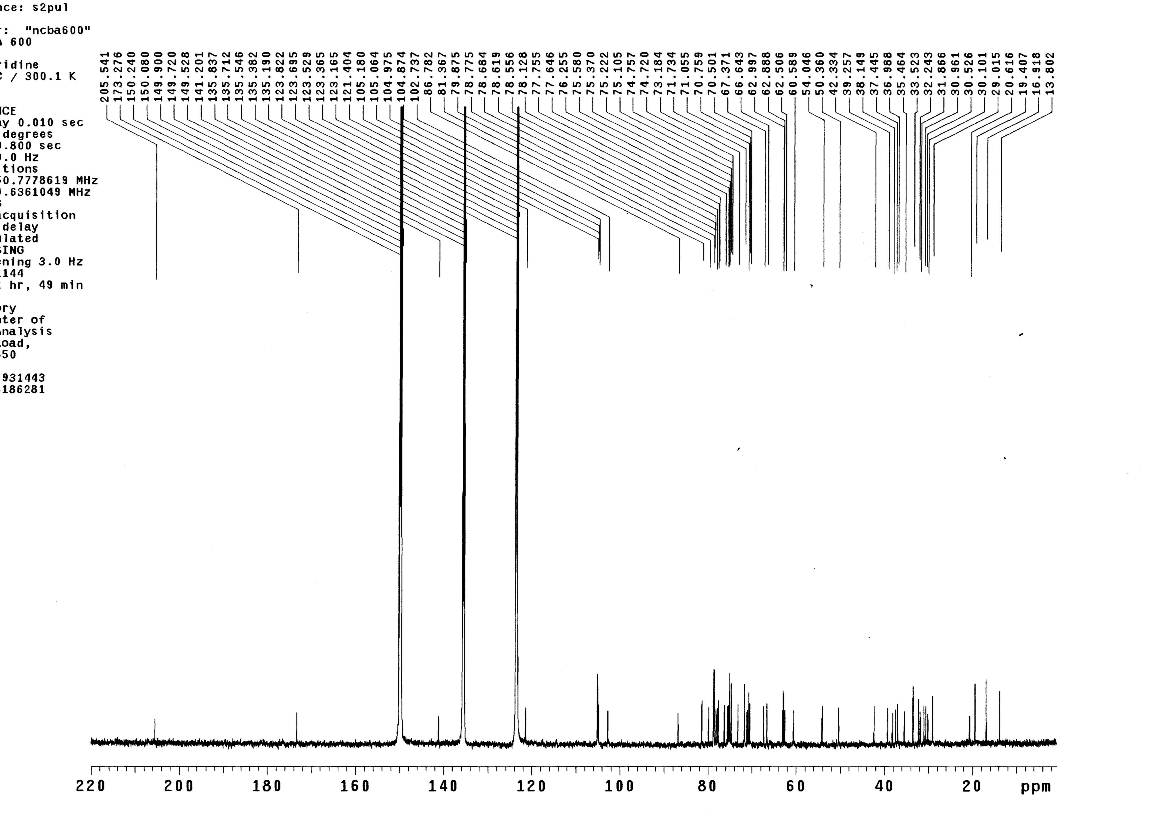


Figure Ec 13C-NMR of compound **5**

Figure Fa HR-ESI-MS of compound **6**


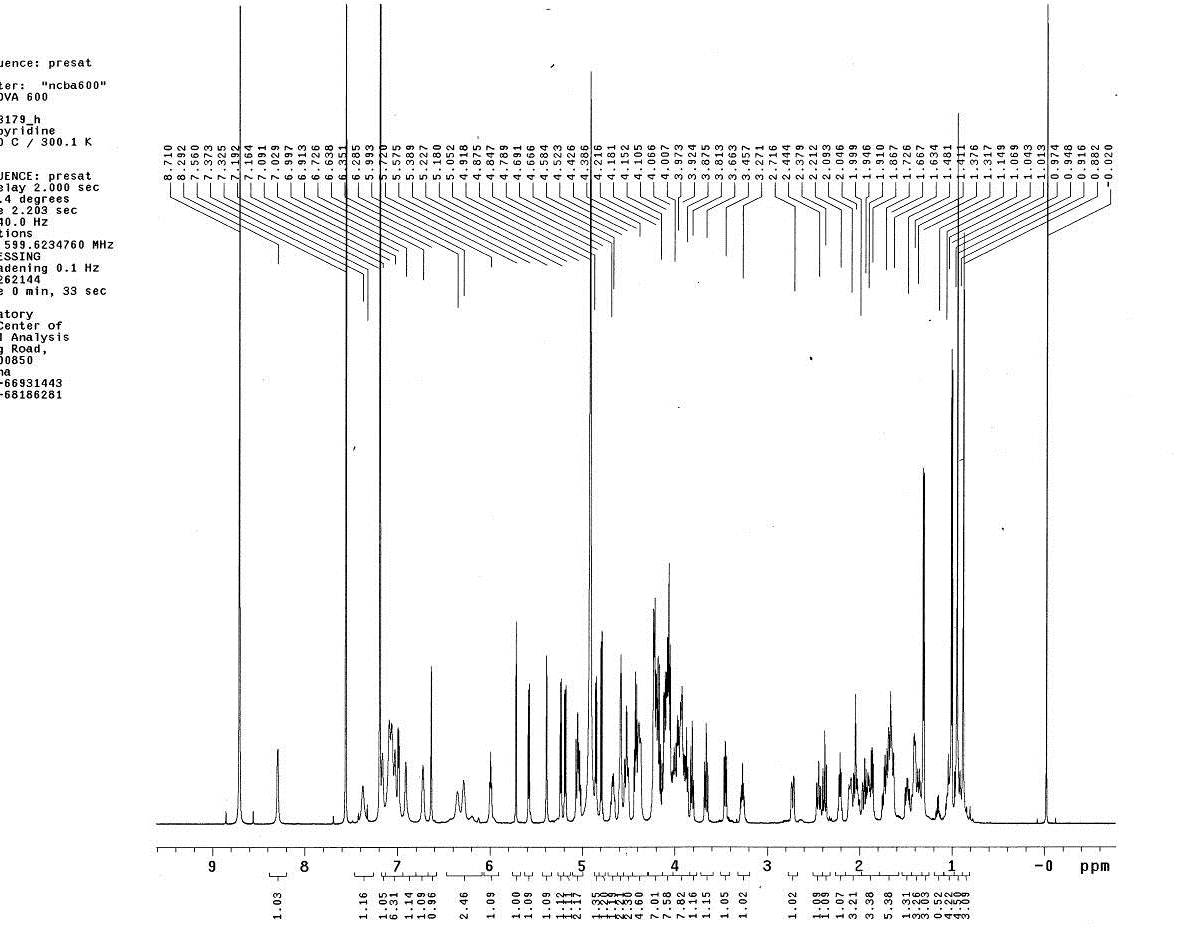


Figure Fb 1H-NMR of compound **6**


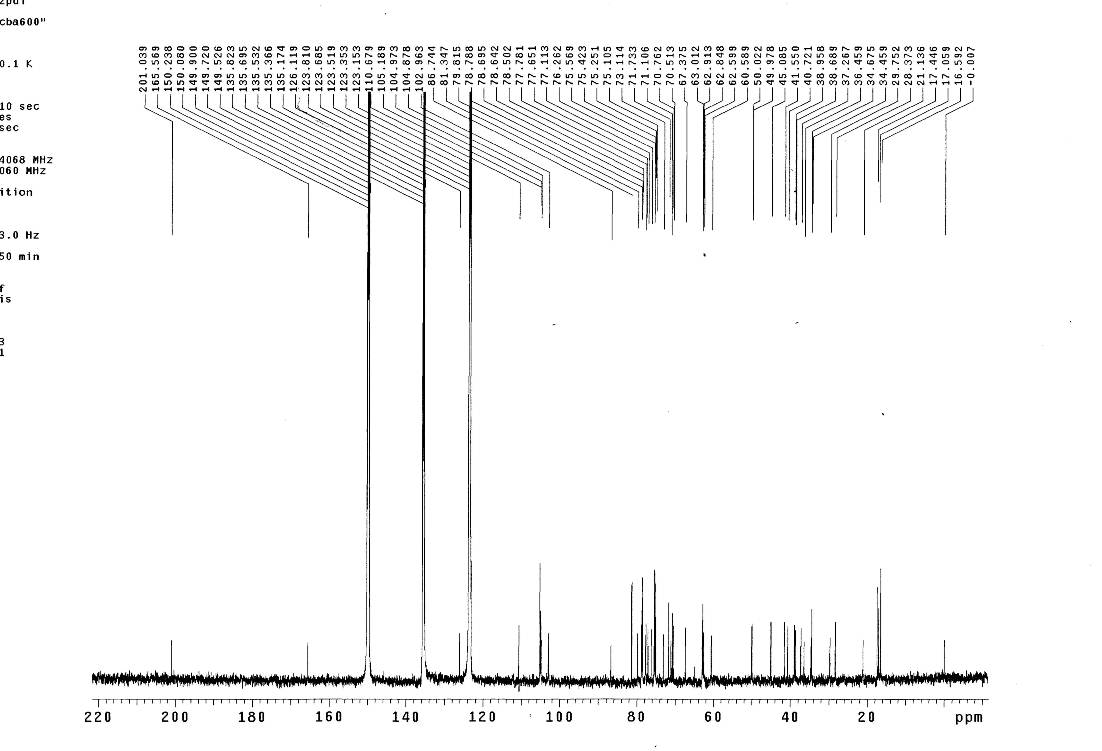


Figure Fc 13C-NMR of compound **6**


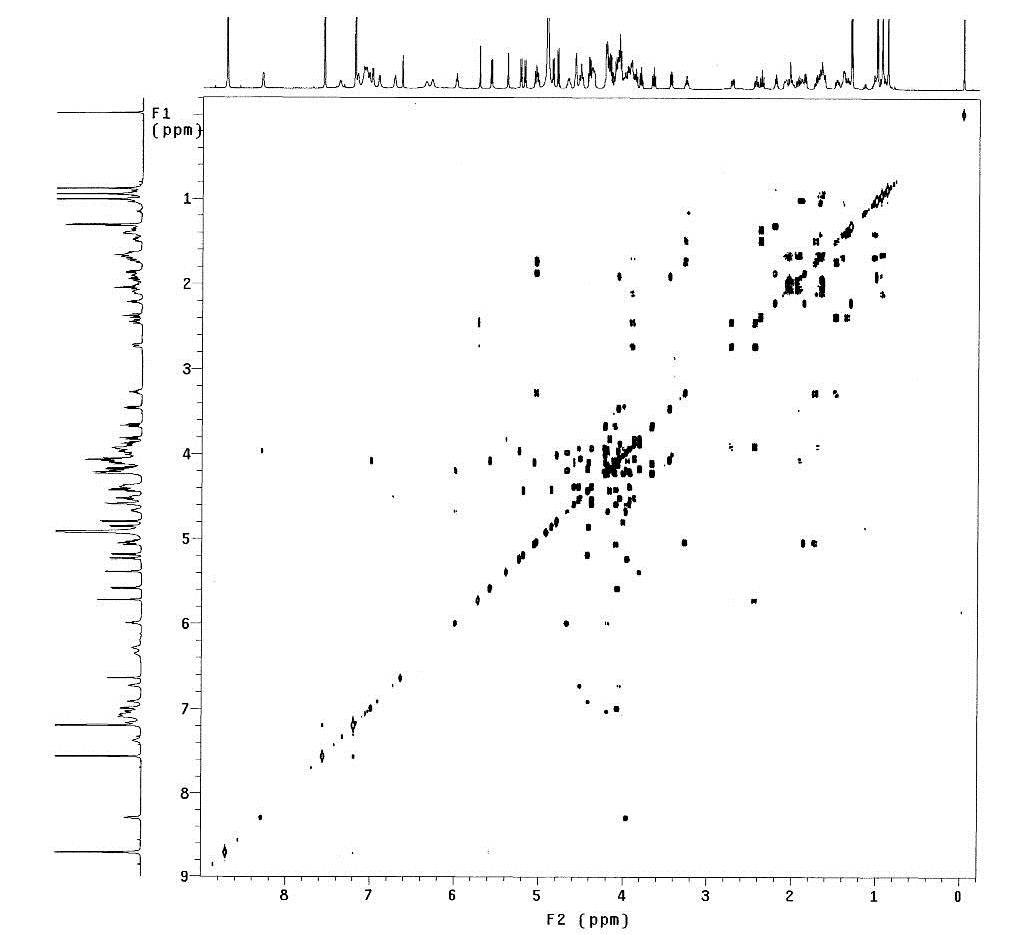


Figure Fd COSY of compound **6**


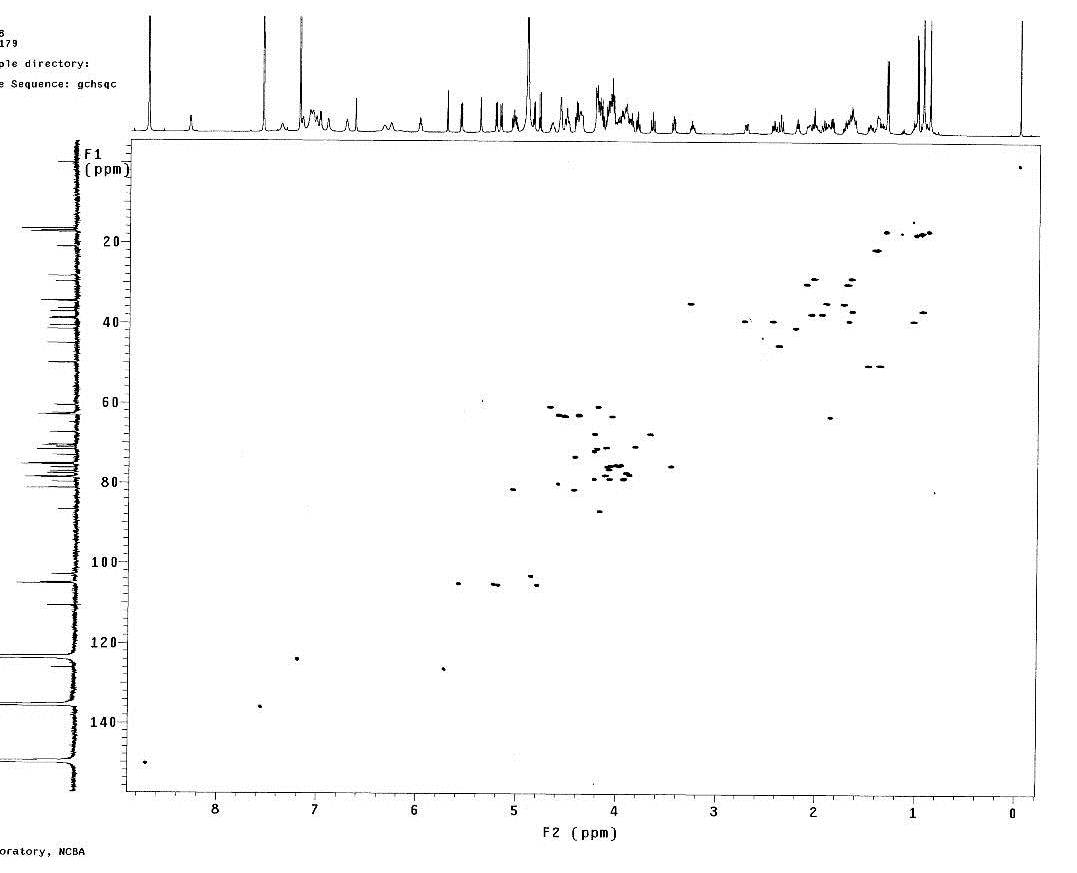


Figure Fe HSQC of compound **6**


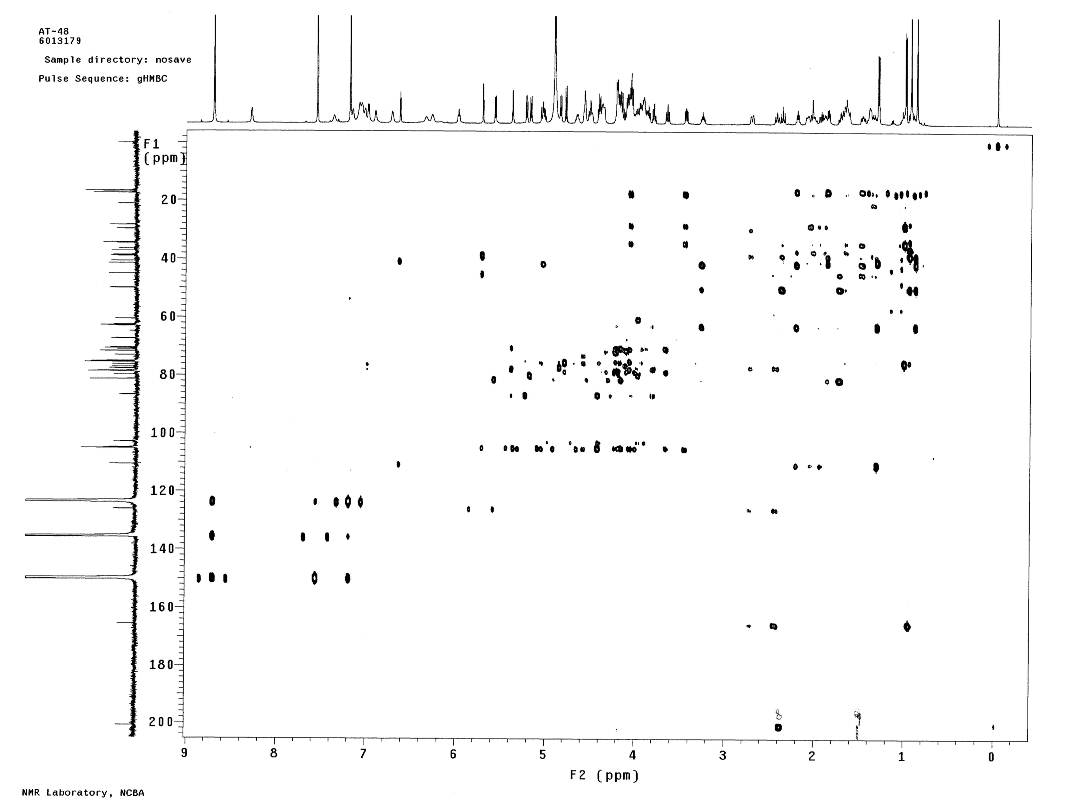


Figure Ff HMBC of compound **6**

Figure Ga HR-ESI-MS of compound **7**


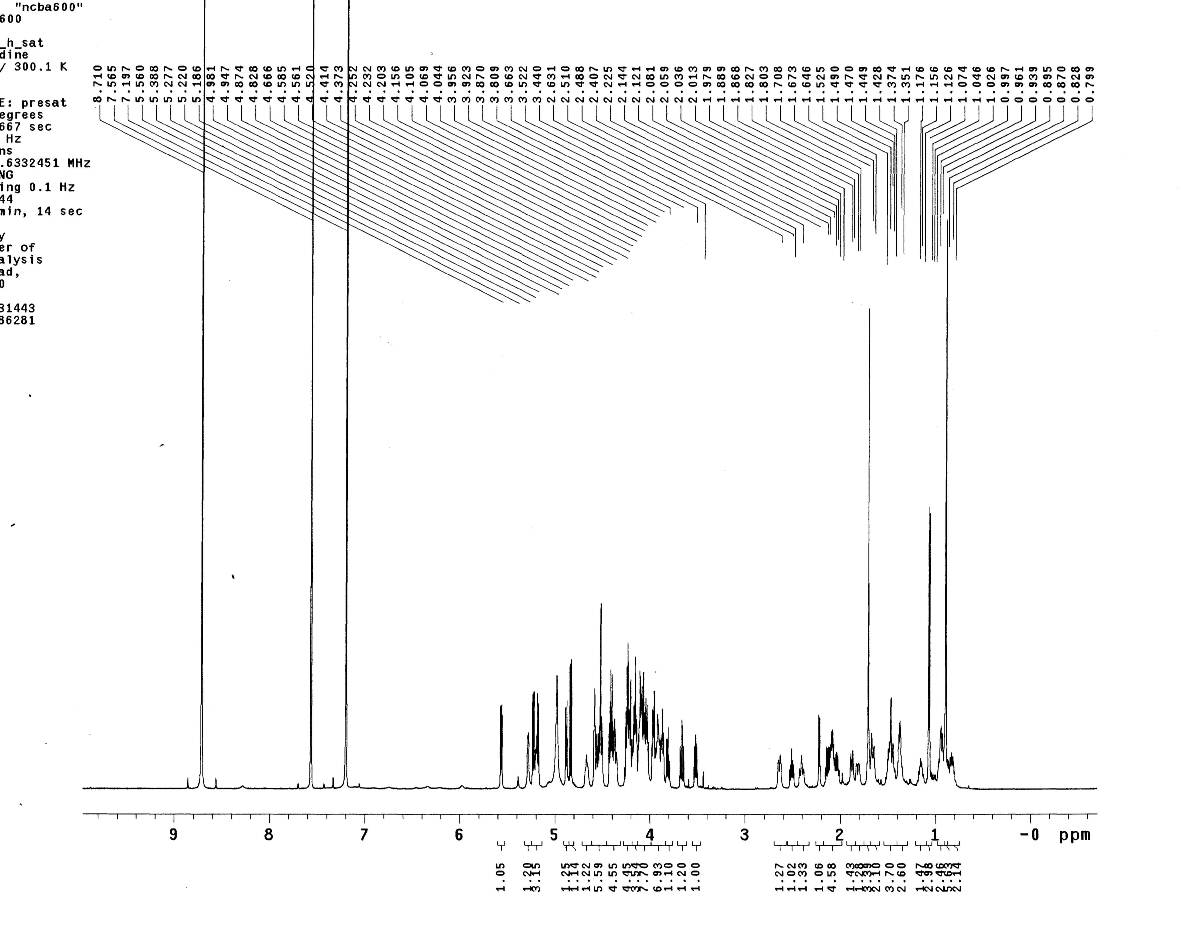


Figure Gb 1H-NMR of compound **7**


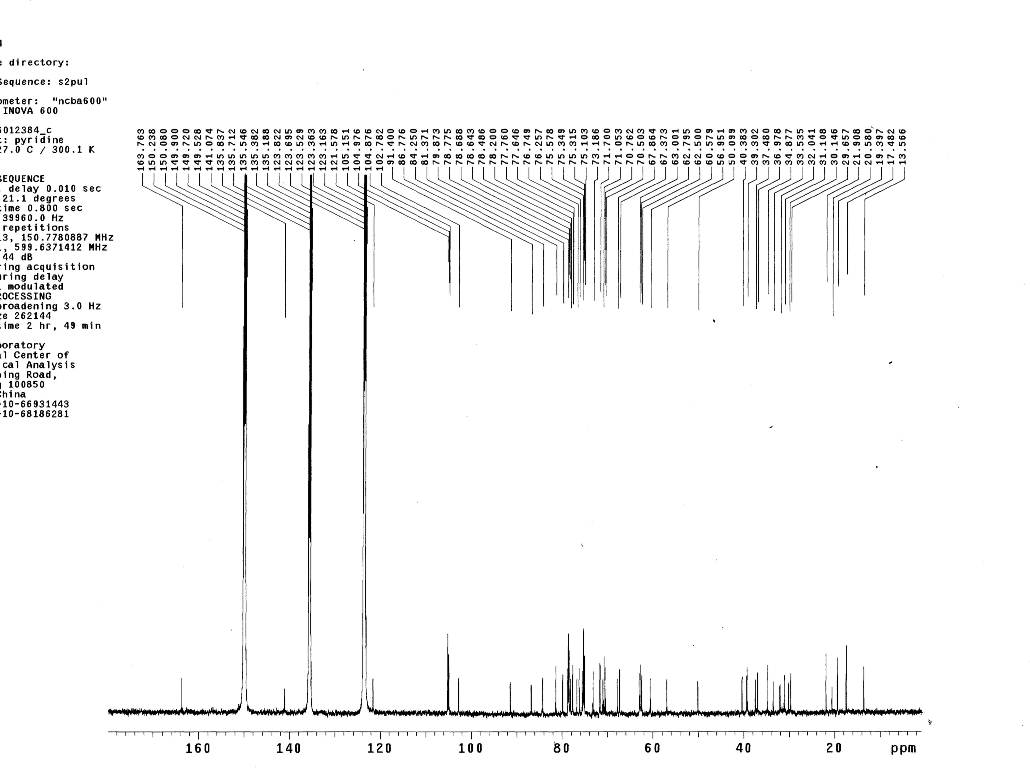


Figure Gc 13C-NMR of compound **7**


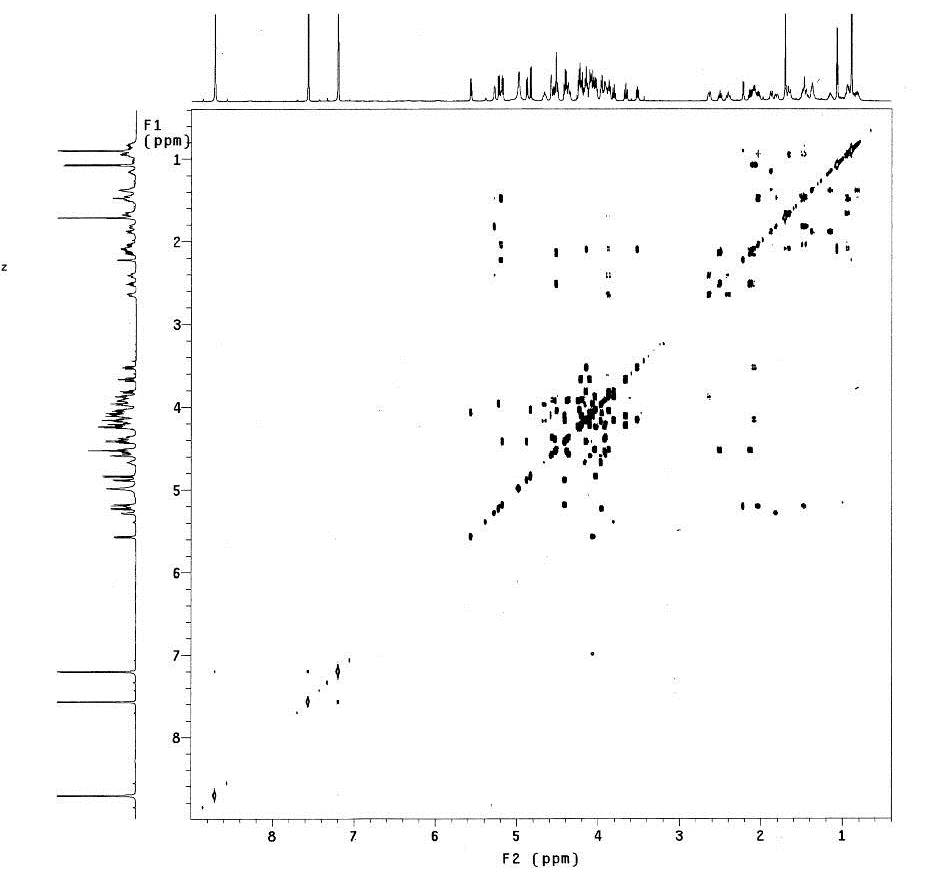


Figure Gd COSY of compound **7**


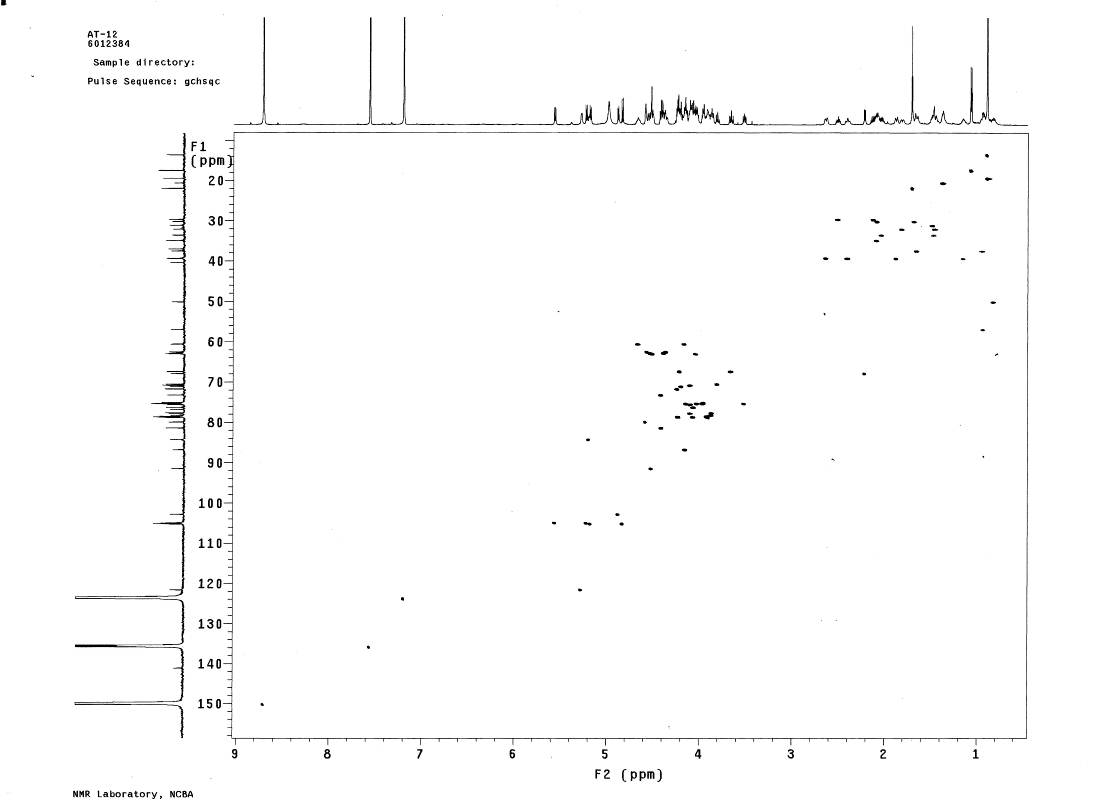


Figure Ge HSQC of compound **7**


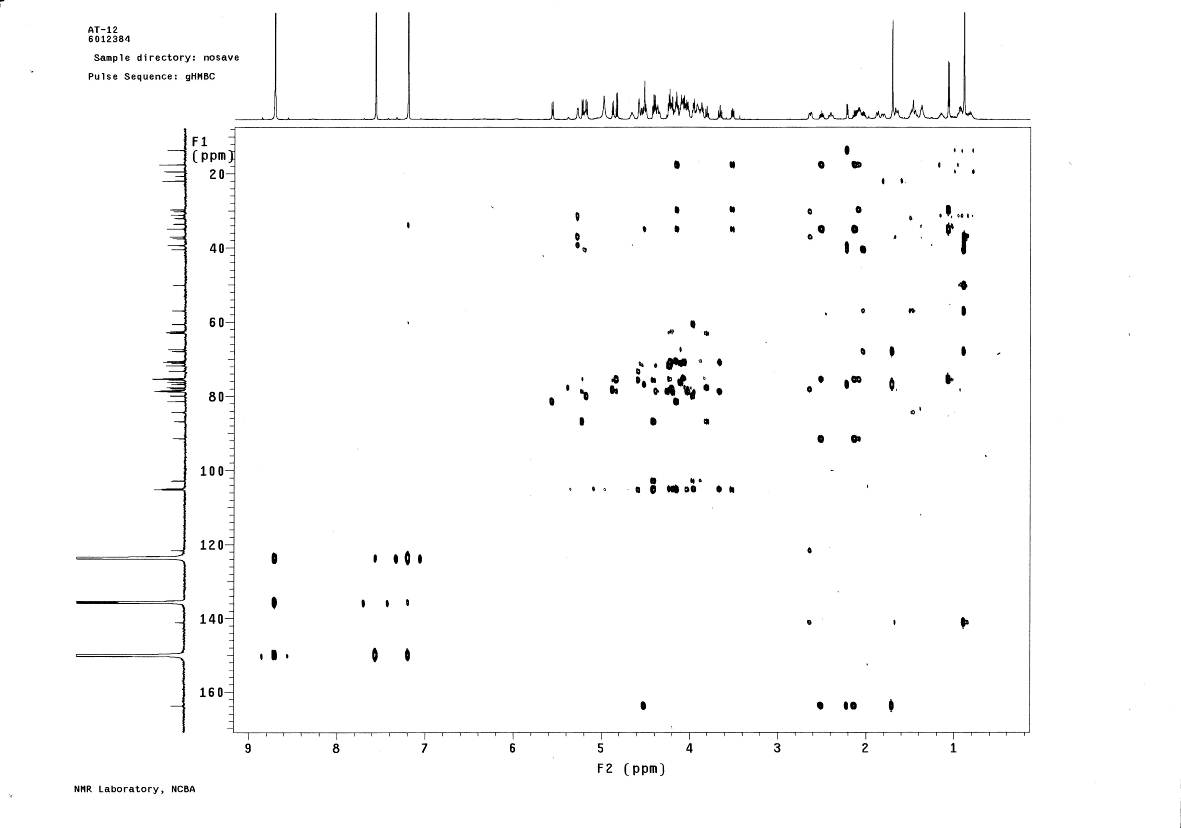


Figure Gf HMBC of compound **7**

**
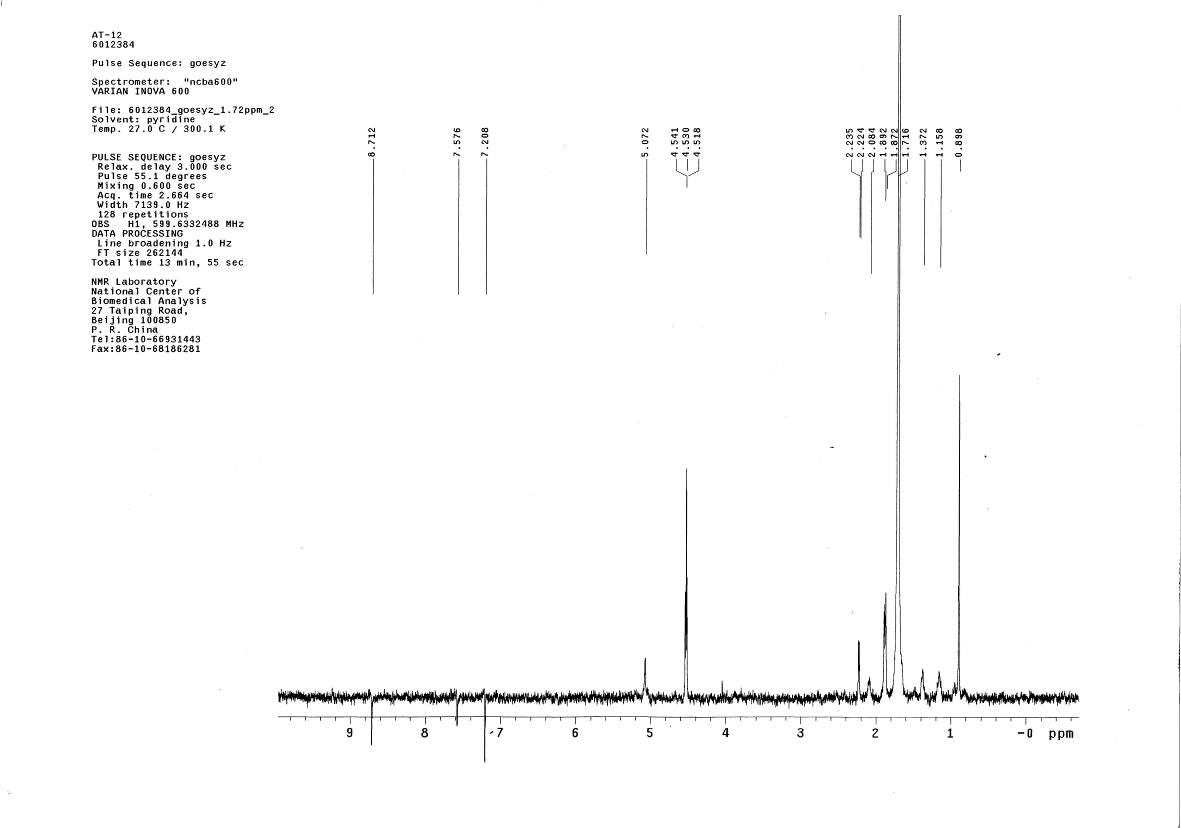
**

Figure Gg NOE of compound **7**

Figure Ha HR-ESI-MS of compound **8**


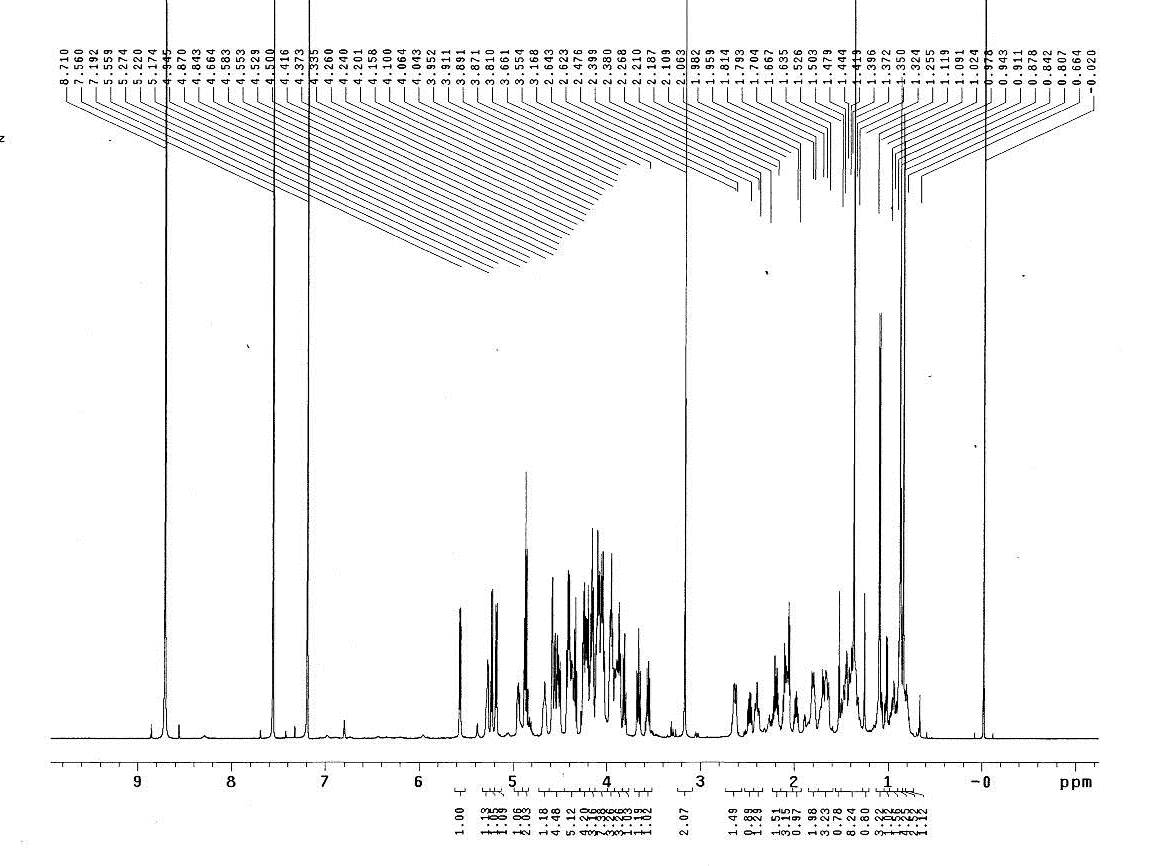


Figure Hb 1H-NMR of compound **8**


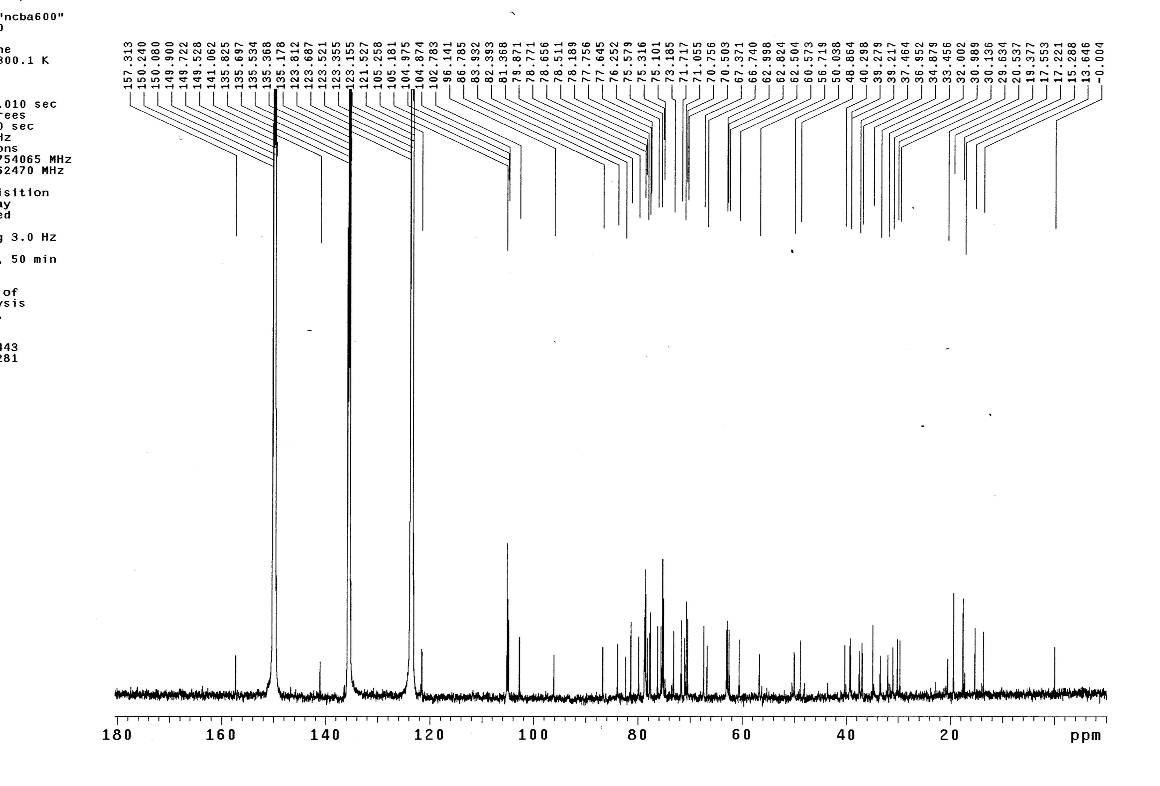


Figure Hc 13C-NMR of compound **8**

Figure Ia HR-ESI-MS of compound **9**


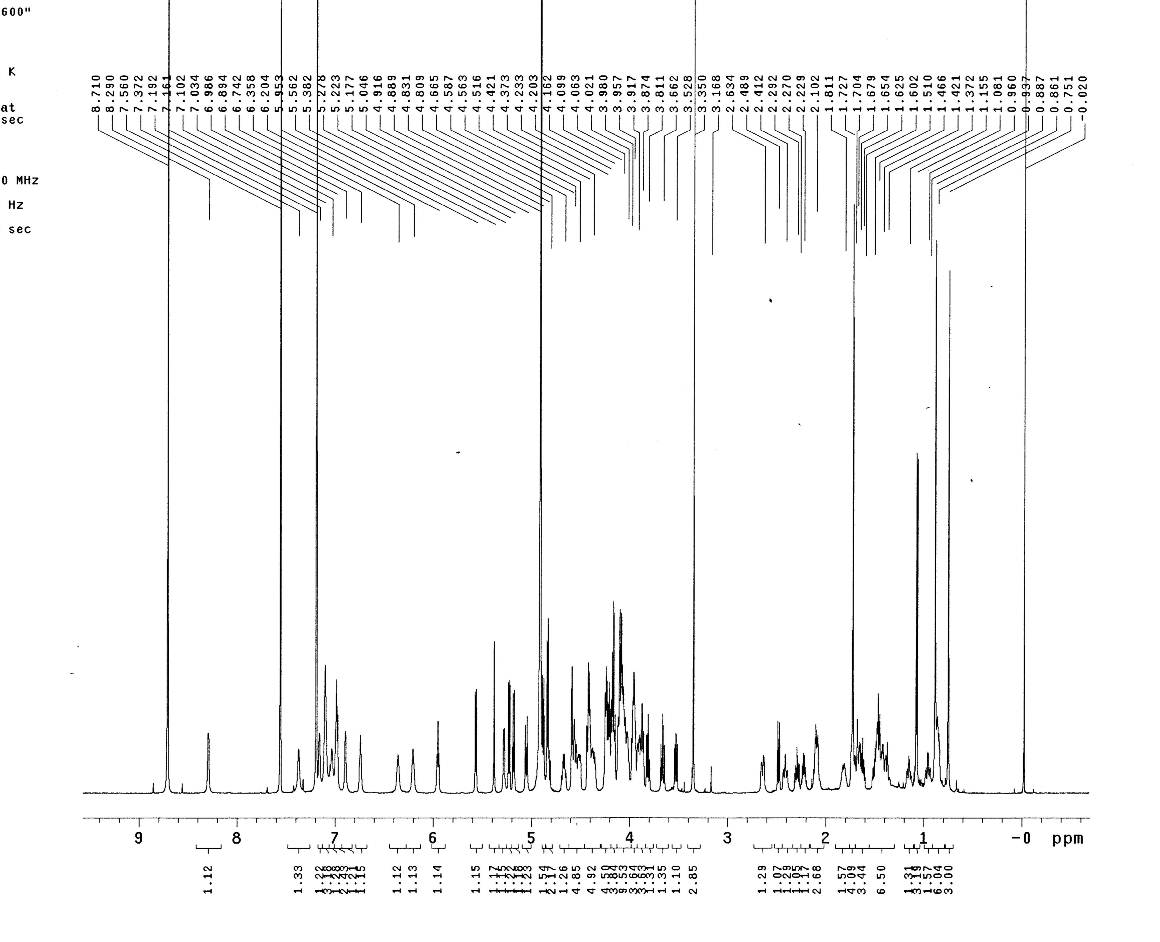


Figure Ib 1H-NMR of compound **9**


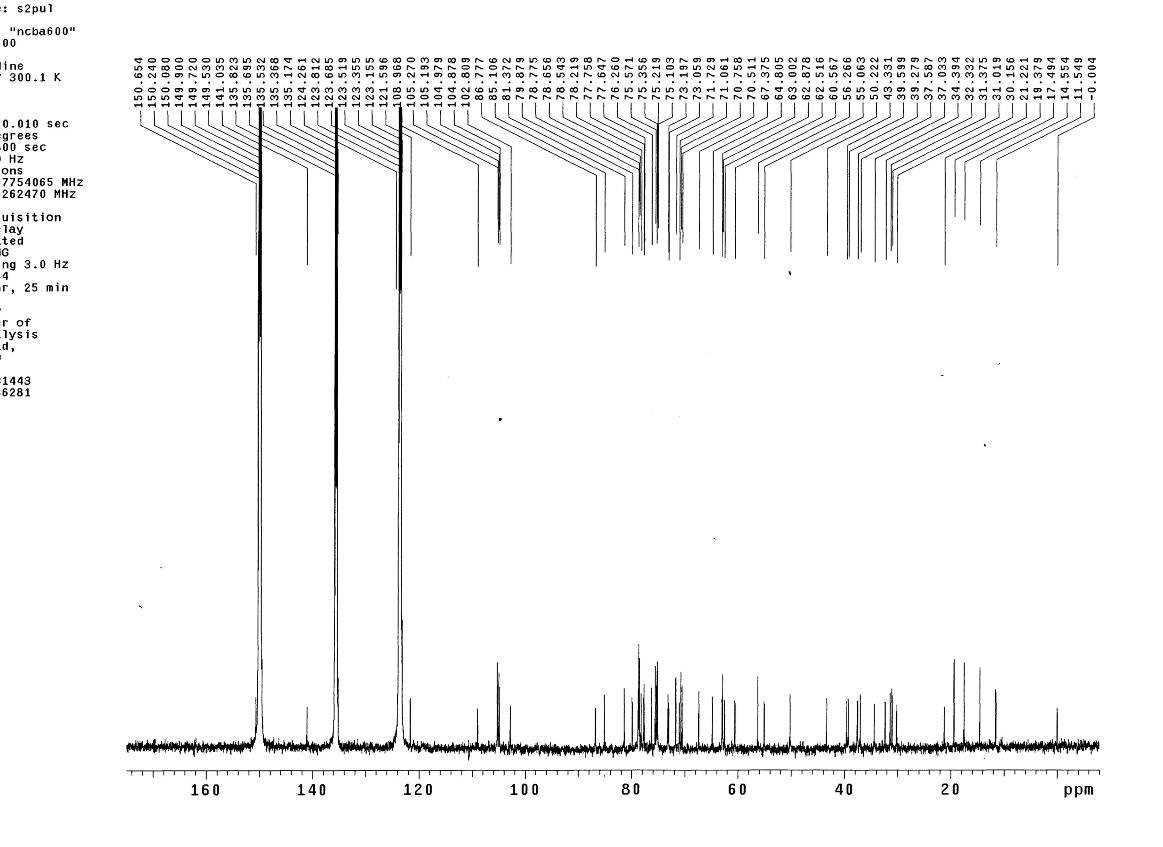


Figure Ic 13C-NMR of compound **9**

Figure Ja HR-ESI-MS of compound **10**


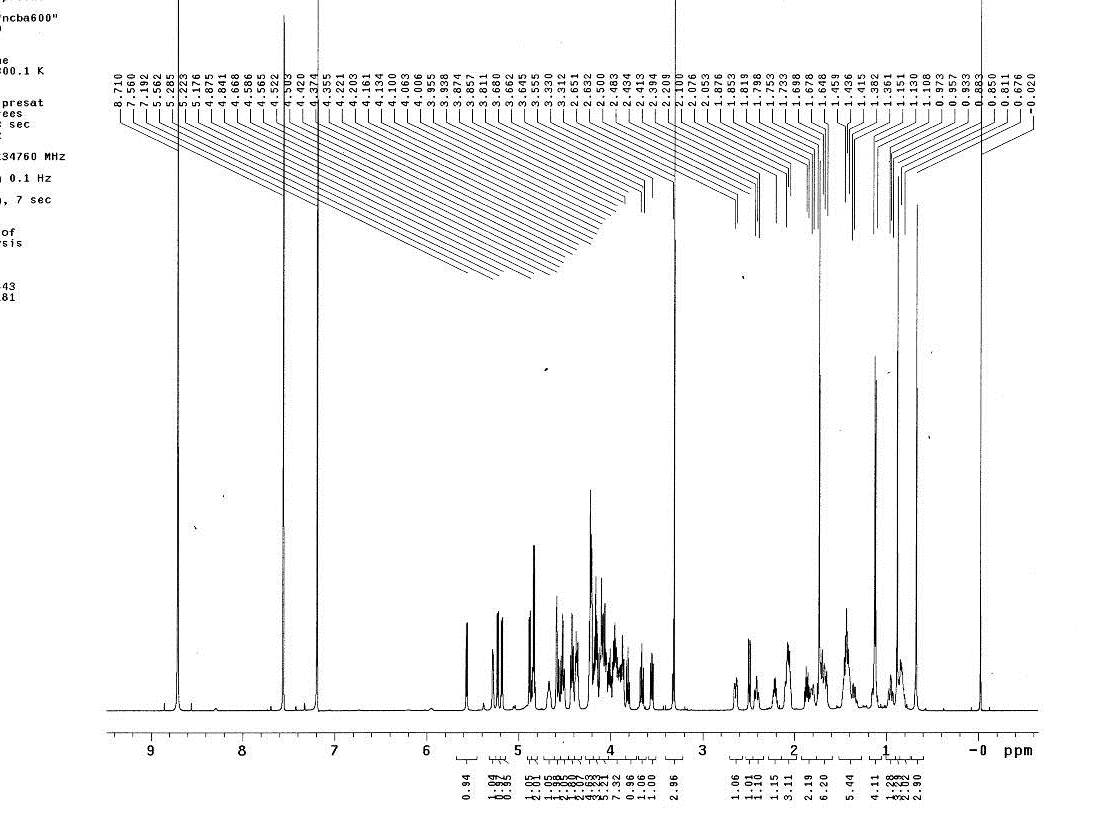


Figure Jb 1H-NMR of compound **10**


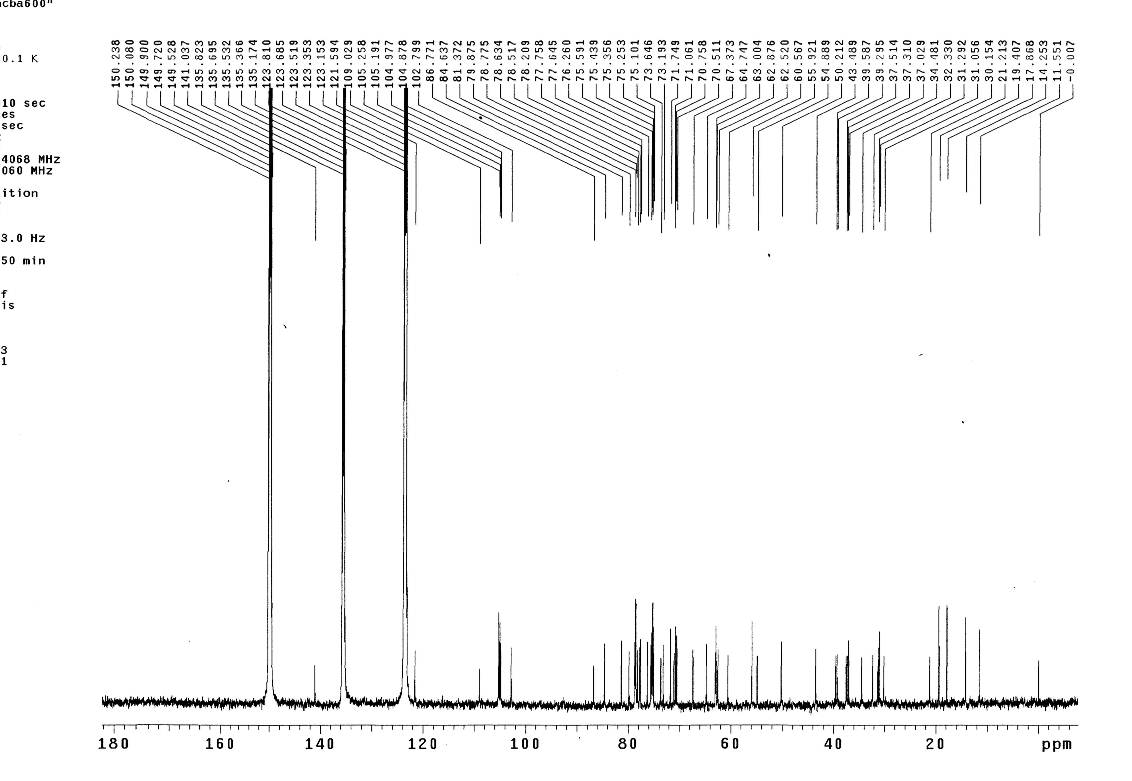
Figure Jc 13C-NMR of compound **10**

Figure Ka HR-ESI-MS of compound **11**


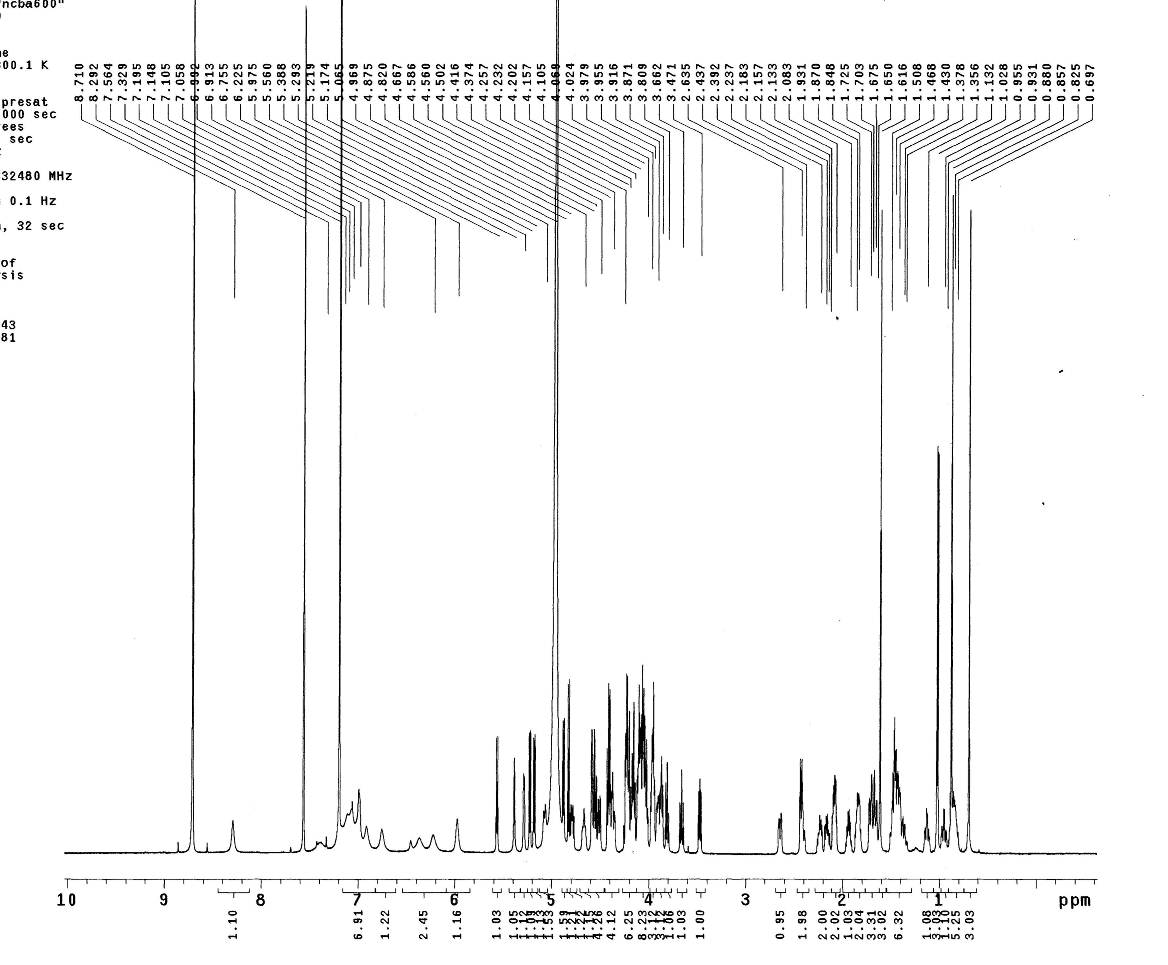


Figure Kb 1H-NMR of compound **11**


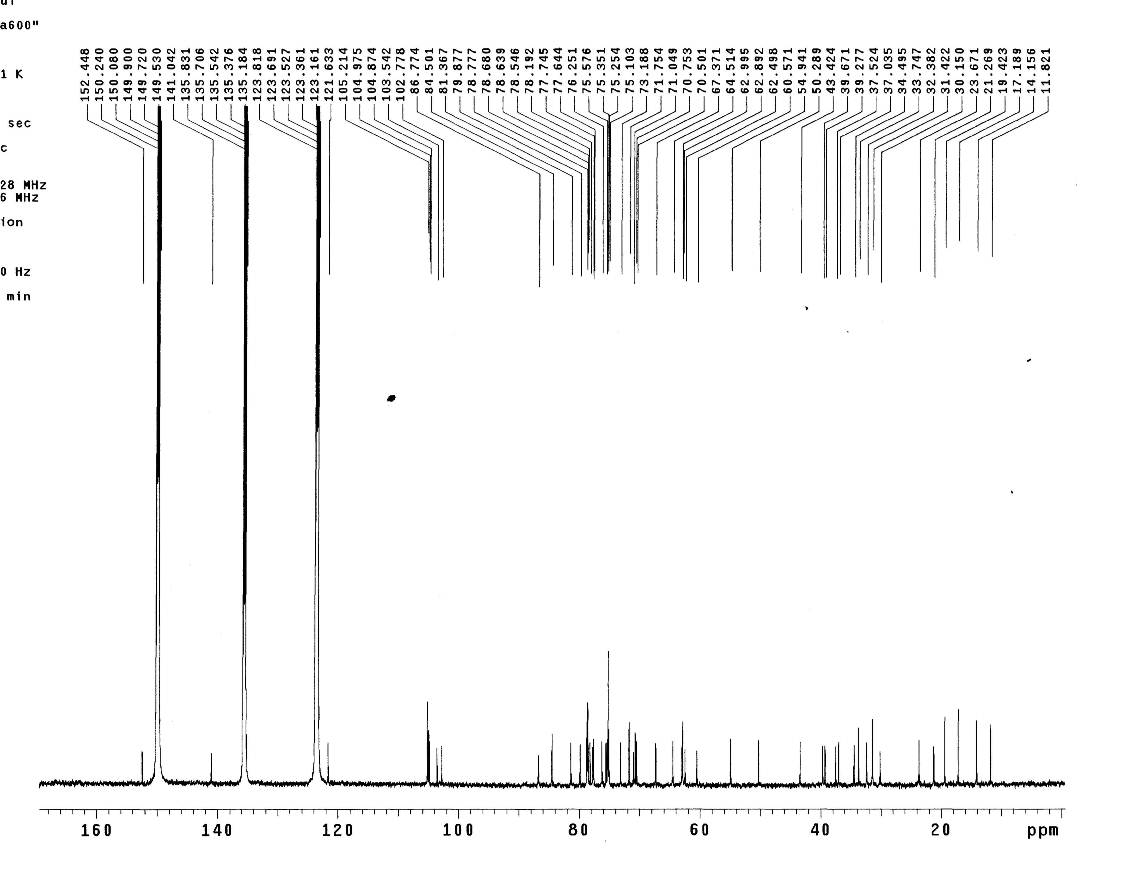


Figure Kc 13C-NMR of compound **11**

Figure La HR-ESI-MS of compound **12**


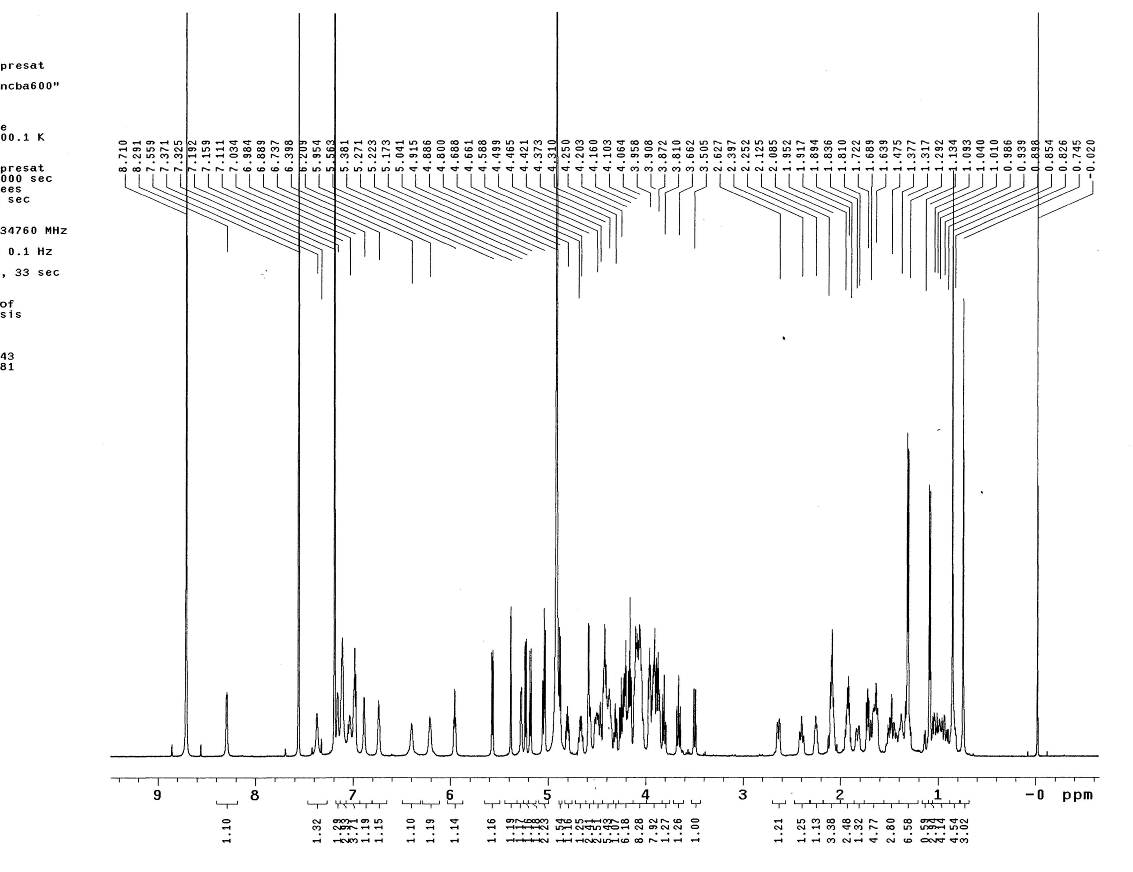


Figure Lb 1H-NMR of compound **12**


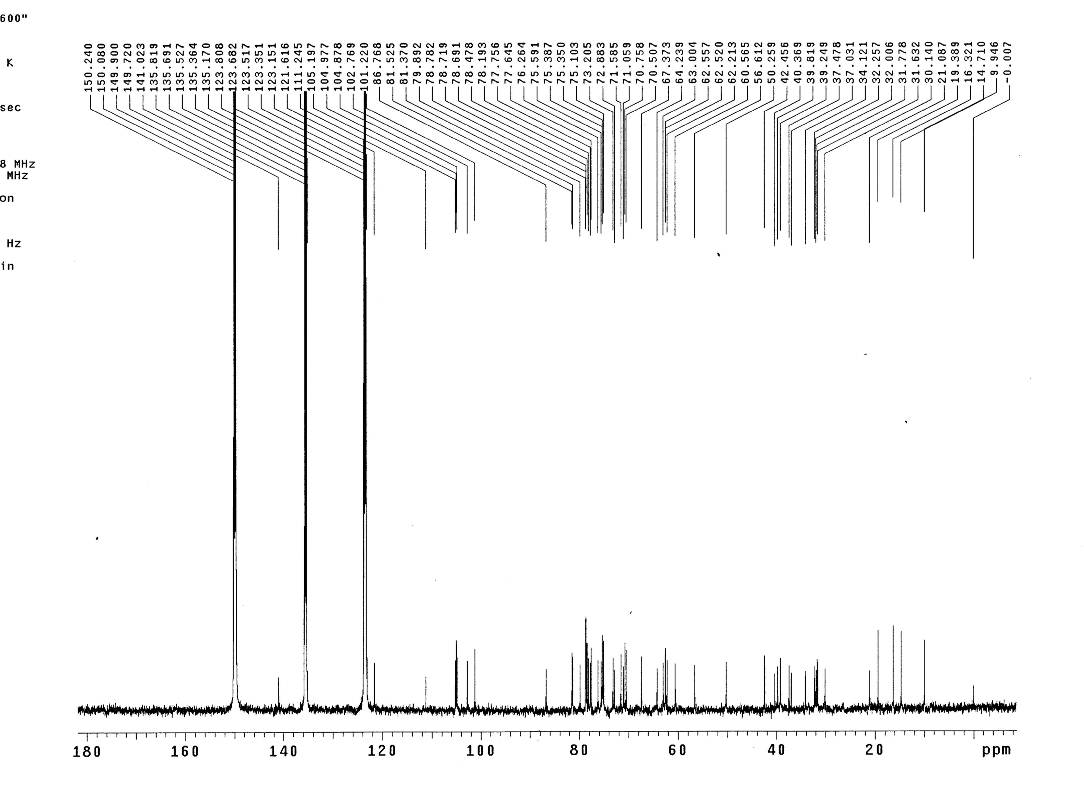


Figure Lc 13C-NMR of compound **12**

Figure Ld 1H-1H COSY of compound **12**

Figure Lc HSQC of compound **12**

Figure Ld HMBC of compound **12**
